# Supplementary material for: Polar Phenol Detection in Plasma and Serum: Insights on Sample Pre-Treatment for LC/MS Analysis and Application on the Serum of Corinthian Currant-Fed Rats
Source: MDPI journal article supplement (doi:10.3390/biom12121838), 2022-12-08
Supplement: s1 [file s1]

## Supplementary Material

**Table S1.** Chromatographic and mass spectral data acquired in (-)-HESI for each analyte and the internal standard (IS).

[illegible]

|                                      |       |                                                 |                                                              |          |          |       |                                                               |
|--------------------------------------|-------|-------------------------------------------------|--------------------------------------------------------------|----------|----------|-------|---------------------------------------------------------------|
| Catechin                             | 8.27  | C <sub>15</sub> H <sub>14</sub> O <sub>6</sub>  | C <sub>15</sub> H <sub>16</sub> O <sub>6</sub> <sup>-</sup>  | 289.0718 | 289.0720 | -0.69 | 245.0817/ 205.0499/ 179.0344/<br>165.0182/ 137.020 / 109.0279 |
| Epicatechin                          | 8.58  | C <sub>15</sub> H <sub>14</sub> O <sub>6</sub>  | C <sub>15</sub> H <sub>13</sub> O <sub>6</sub> <sup>-</sup>  | 289.0718 | 289.0720 | -0.69 | 245.0821/ 205.0503/ 179.0341/<br>165.0182/ 137.031/ 109.0279  |
| Epicatechin gallate                  | 9.18  | C <sub>22</sub> H <sub>18</sub> O <sub>10</sub> | C <sub>22</sub> H <sub>17</sub> O <sub>10</sub> <sup>-</sup> | 441.0827 | 441.0831 | -0.91 | n.d.                                                          |
| Epigallocatechin                     | 7.89  | C <sub>15</sub> H <sub>14</sub> O <sub>7</sub>  | C <sub>15</sub> H <sub>13</sub> O <sub>7</sub> <sup>-</sup>  | 305.0667 | 305.0668 | -0.33 | n.d.                                                          |
| Epigallocatechin gallate             | 8.67  | C <sub>22</sub> H <sub>18</sub> O <sub>11</sub> | C <sub>22</sub> H <sub>17</sub> O <sub>11</sub> <sup>-</sup> | 457.0776 | 457.0783 | -1.53 | n.d.                                                          |
| <b>Flavonol glycosides</b>           |       |                                                 |                                                              |          |          |       |                                                               |
| Isoquercetin                         | 8.97  | C <sub>21</sub> H <sub>20</sub> O <sub>12</sub> | C <sub>21</sub> H <sub>19</sub> O <sub>12</sub> <sup>-</sup> | 463.0882 | 463.0891 | -1.94 | 301.0350/ 300.0279                                            |
| Rutin                                | 8.77  | C <sub>27</sub> H <sub>30</sub> O <sub>16</sub> | C <sub>27</sub> H <sub>29</sub> O <sub>16</sub> <sup>-</sup> | 609.1461 | 609.1469 | -1.31 | 301.0361/ 300.0278/ 343.0461/<br>271.0252                     |
| <b>Stilbenes</b>                     |       |                                                 |                                                              |          |          |       |                                                               |
| <i>trans</i> -Resveratrol            | 10.56 | C <sub>14</sub> H <sub>12</sub> O <sub>3</sub>  | C <sub>14</sub> H <sub>11</sub> O <sub>3</sub> <sup>-</sup>  | 227.0714 | 227.0711 | 1.32  | 185.0599/ 143.0490                                            |
| E-Viniferin                          | 11.68 | C <sub>28</sub> H <sub>22</sub> O <sub>6</sub>  | C <sub>28</sub> H <sub>21</sub> O <sub>6</sub> <sup>-</sup>  | 453.1344 | 453.1351 | -1.54 | n.d.                                                          |
| Piceid                               | 9.03  | C <sub>20</sub> H <sub>22</sub> O <sub>8</sub>  | C <sub>20</sub> H <sub>21</sub> O <sub>8</sub> <sup>-</sup>  | 389.1242 | 389.1251 | -2.31 | 227.0711                                                      |
| <b>Phenylethanoids</b>               |       |                                                 |                                                              |          |          |       |                                                               |
| 3-Hydroxytyrosol                     | 7.59  | C <sub>8</sub> H <sub>10</sub> O <sub>3</sub>   | C <sub>8</sub> H <sub>9</sub> O <sub>3</sub> <sup>-</sup>    | 153.0546 | 153.0544 | 1.31  | 123.0436                                                      |
| Oleuropein                           | 9.53  | C <sub>25</sub> H <sub>32</sub> O <sub>13</sub> | C <sub>25</sub> H <sub>31</sub> O <sub>13</sub> <sup>-</sup> | 539.1770 | 539.1779 | 1.67  | 377.1239, 275.0923, 307.0821                                  |
| <b>Cinnamic acid and derivatives</b> |       |                                                 |                                                              |          |          |       |                                                               |
| <i>trans</i> -Cinnamic acid          | 12.00 | C <sub>9</sub> H <sub>8</sub> O <sub>2</sub>    | C <sub>9</sub> H <sub>7</sub> O <sub>2</sub> <sup>-</sup>    | 147.0441 | 147.0438 | 2.04  | n.d.                                                          |
| Caffeic acid                         | 8.75  | C <sub>9</sub> H <sub>8</sub> O <sub>4</sub>    | C <sub>9</sub> H <sub>7</sub> O <sub>4</sub> <sup>-</sup>    | 179.0339 | 179.0341 | -1.12 | 135.0438                                                      |
| Chlorogenic acid                     | 8.08  | C <sub>16</sub> H <sub>18</sub> O <sub>9</sub>  | C <sub>16</sub> H <sub>17</sub> O <sub>9</sub> <sup>-</sup>  | 353.0878 | 353.0882 | -1.13 | n.d.                                                          |
| <i>o</i> -Coumaric acid              | 10.22 | C <sub>9</sub> H <sub>8</sub> O <sub>3</sub>    | C <sub>9</sub> H <sub>7</sub> O <sub>3</sub> <sup>-</sup>    | 163.0390 | 163.0387 | 1.84  | 119.0487                                                      |
| <i>p</i> -Coumaric acid              | 9.39  | C <sub>9</sub> H <sub>8</sub> O <sub>3</sub>    | C <sub>9</sub> H <sub>7</sub> O <sub>3</sub> <sup>-</sup>    | 163.0390 | 163.0388 | 1.23  | 191.0554/ 179.0341                                            |
| Ferulic acid                         | 9.53  | C <sub>10</sub> H <sub>10</sub> O <sub>4</sub>  | C <sub>10</sub> H <sub>9</sub> O <sub>4</sub> <sup>-</sup>   | 193.0495 | 193.0499 | -2.07 | 178.0263/ 149.0596/ 134.0359                                  |
| Neochlorogenic acid                  | 7.56  | C <sub>16</sub> H <sub>18</sub> O <sub>9</sub>  | C <sub>16</sub> H <sub>17</sub> O <sub>9</sub> <sup>-</sup>  | 353.0878 | 353.0883 | -1.42 | n.d.                                                          |
| Sinapic acid                         | 9.41  | C <sub>11</sub> H <sub>12</sub> O <sub>5</sub>  | C <sub>11</sub> H <sub>11</sub> O <sub>5</sub> <sup>-</sup>  | 223.0612 | 223.0608 | 1.79  | n.d.                                                          |

| Benzoic acid derivatives |       |                                                              |                                                                           |          |          |       |                                         |
|--------------------------|-------|--------------------------------------------------------------|---------------------------------------------------------------------------|----------|----------|-------|-----------------------------------------|
| Gallic acid              | 4.68  | C <sub>7</sub> H <sub>6</sub> O <sub>5</sub>                 | C <sub>7</sub> H <sub>5</sub> O <sub>5</sub> <sup>-</sup>                 | 169.0131 | 169.0132 | -0.59 | 125.0229/ 97.0278/ 81.0329              |
| Syringic acid            | 8.81  | C <sub>9</sub> H <sub>10</sub> O <sub>5</sub>                | C <sub>9</sub> H <sub>9</sub> O <sub>5</sub> <sup>-</sup>                 | 197.0444 | 197.0447 | -1.52 | 182.0212/ 23.0079/ 121.0280/<br>95.0122 |
| Vanillic acid            | 9.58  | C <sub>8</sub> H <sub>8</sub> O <sub>4</sub>                 | C <sub>8</sub> H <sub>7</sub> O <sub>4</sub> <sup>-</sup>                 | 167.0339 | 167.0337 | 1.20  | 152.0103/ 123.0436/ 108.0201            |
| Internal Standard        |       |                                                              |                                                                           |          |          |       |                                         |
| Quercetin-d3 (IS)        | 11.02 | C <sub>15</sub> H <sub>7</sub> D <sub>3</sub> O <sub>7</sub> | C <sub>15</sub> H <sub>6</sub> D <sub>3</sub> O <sub>7</sub> <sup>-</sup> | 304.0531 | 304.0543 | 3.95  | n.d.                                    |

**Figures S1a-S9b:** Example extracted ion chromatograms (XICs) of selected polar phenolics for each pre-treatment method tested for plasma and serum samples.

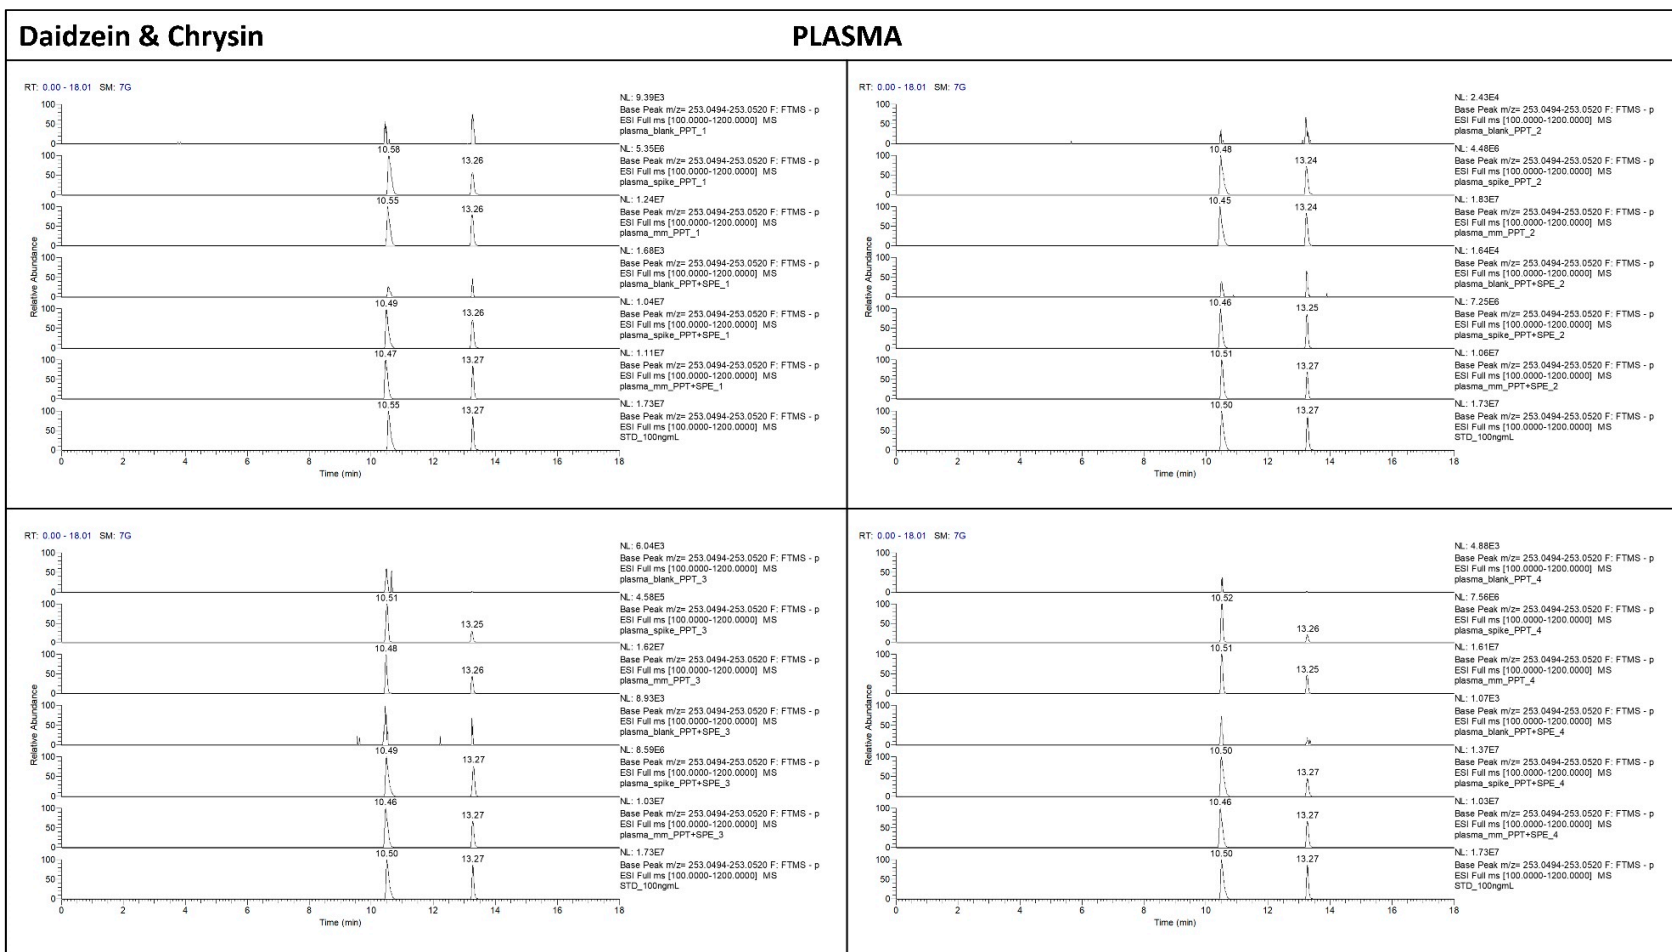

**Figure S1a.** Extracted ion chromatograms (XICs) of daidzein (10.50 min) and chrysin (13.27 min) for each pre-treatment method tested for plasma samples.



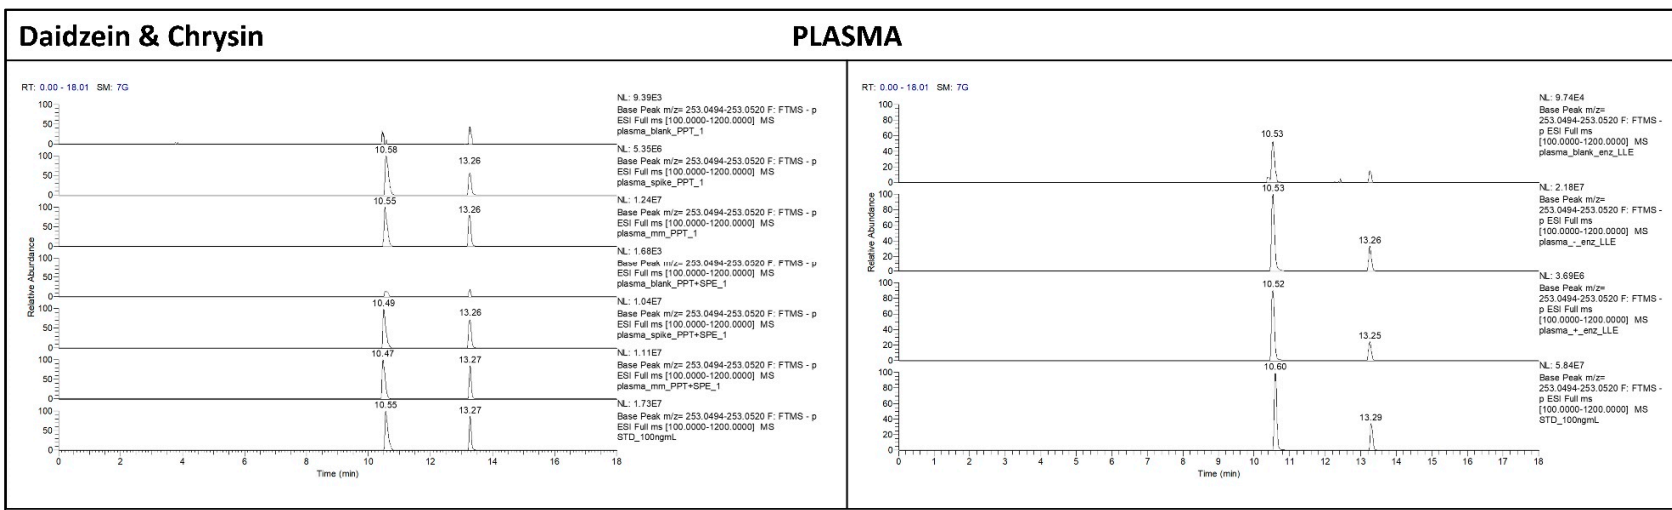

Figure S1a. (continued)

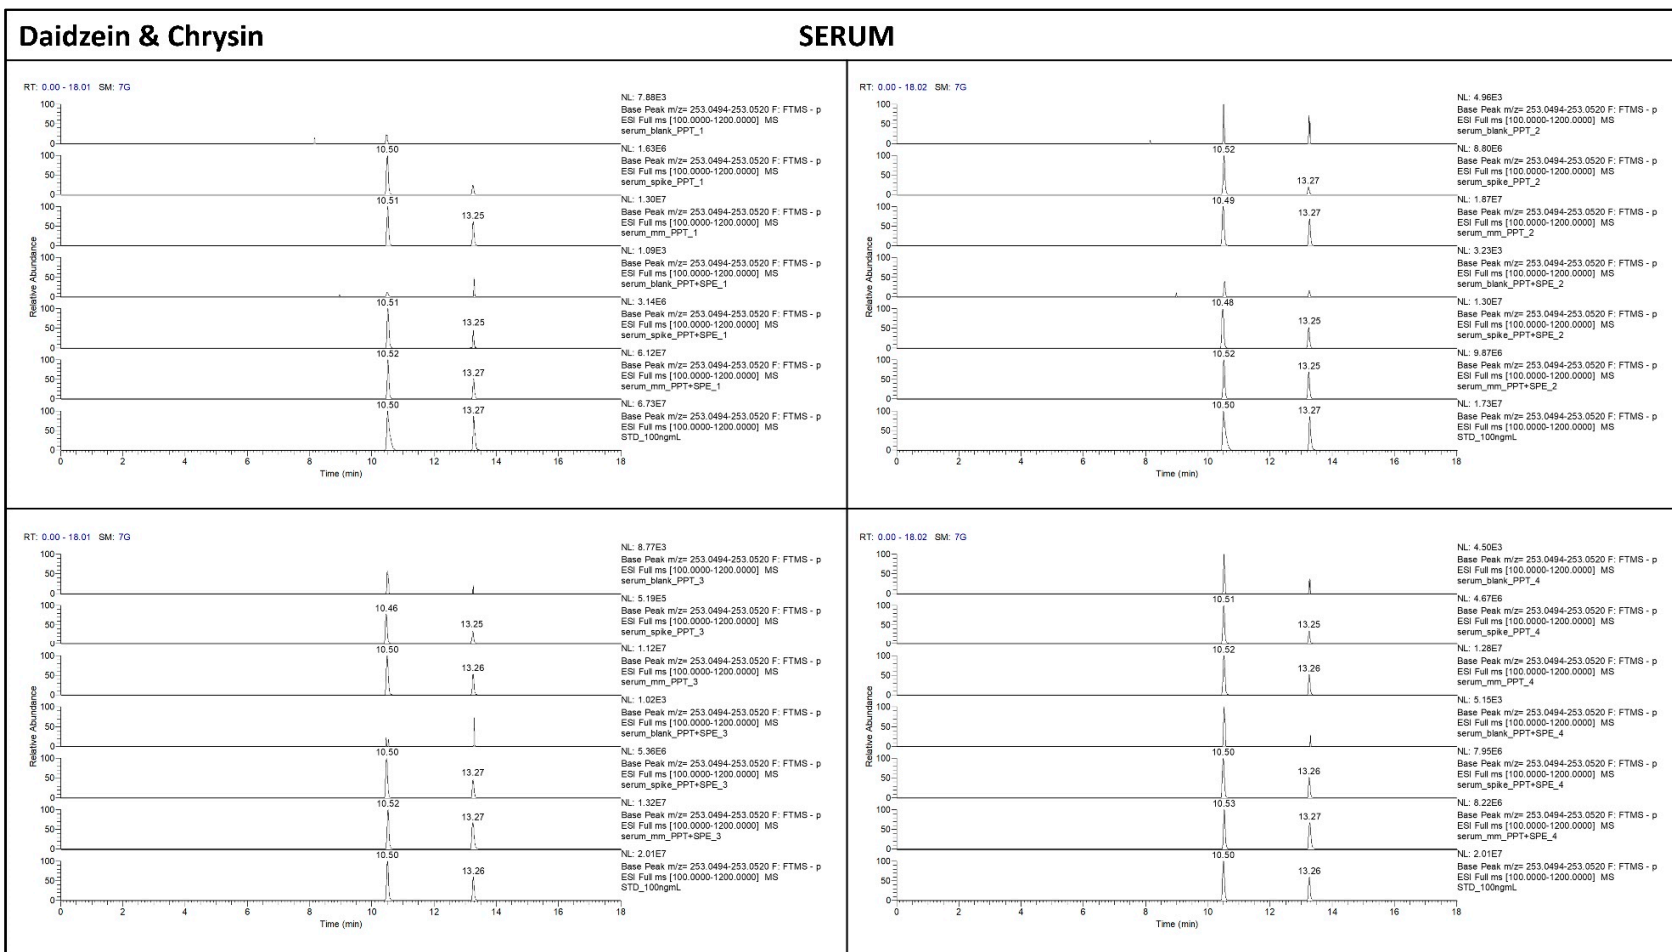

**Figure S1b.** Extracted ion chromatograms (XICs) of daidzein (10.50 min) and chrysin (13.27 min) for each pre-treatment method tested for serum samples.

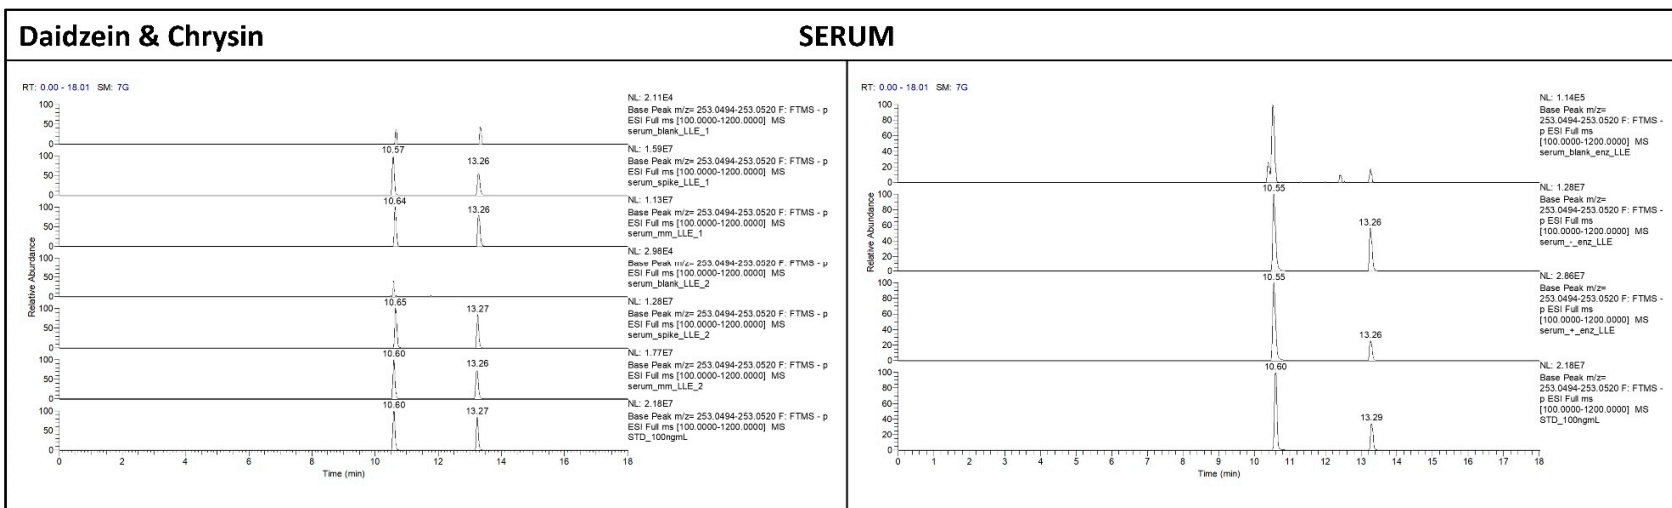

Figure S1b. (continued)

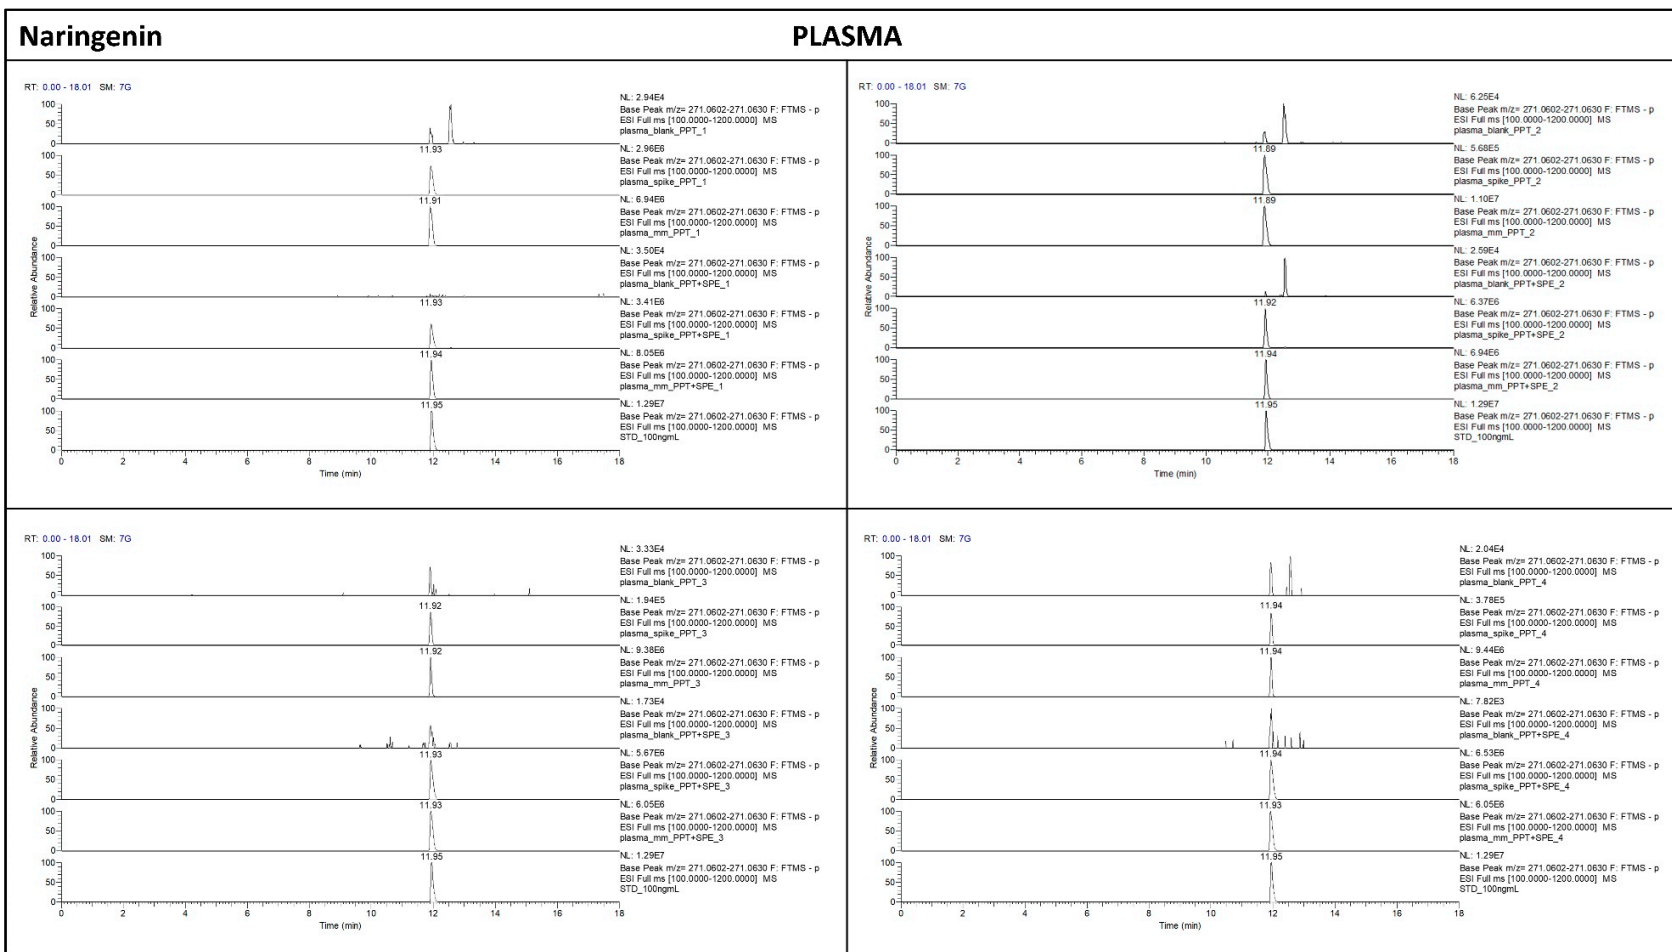

**Figure S2a.** Extracted ion chromatograms (XICs) of naringenin (11.95 min) for each pre-treatment method tested for plasma samples.

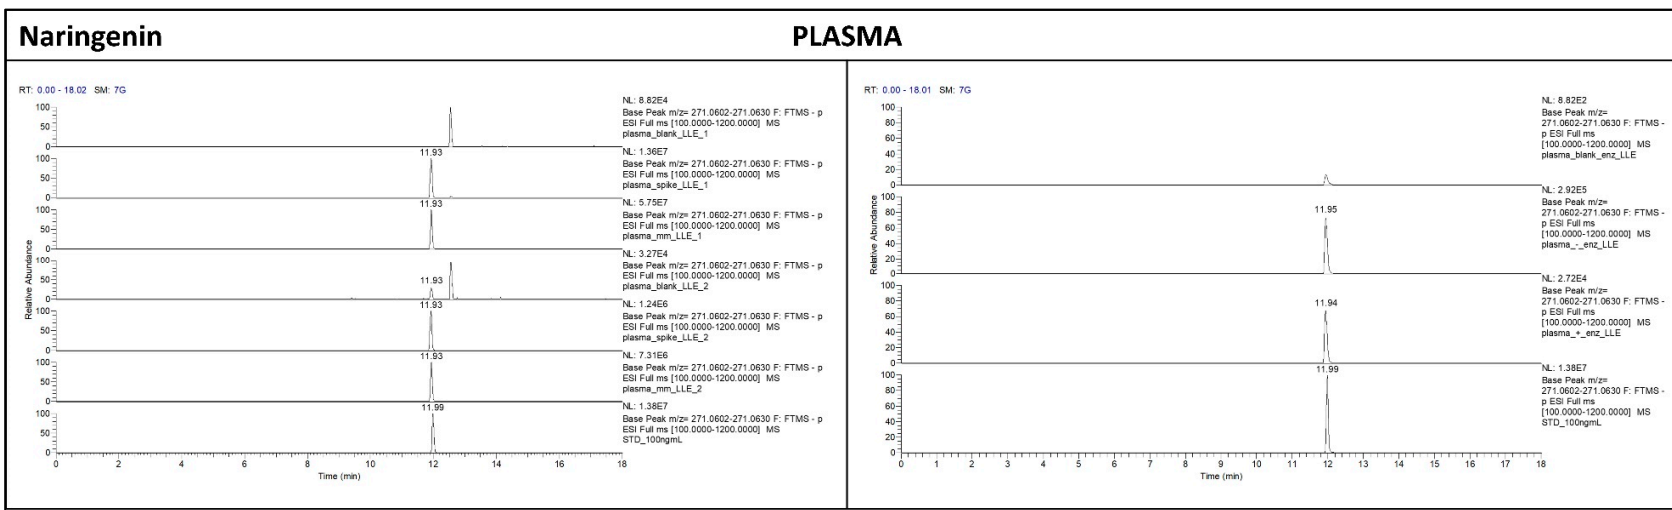

Figure S2a. (continued)

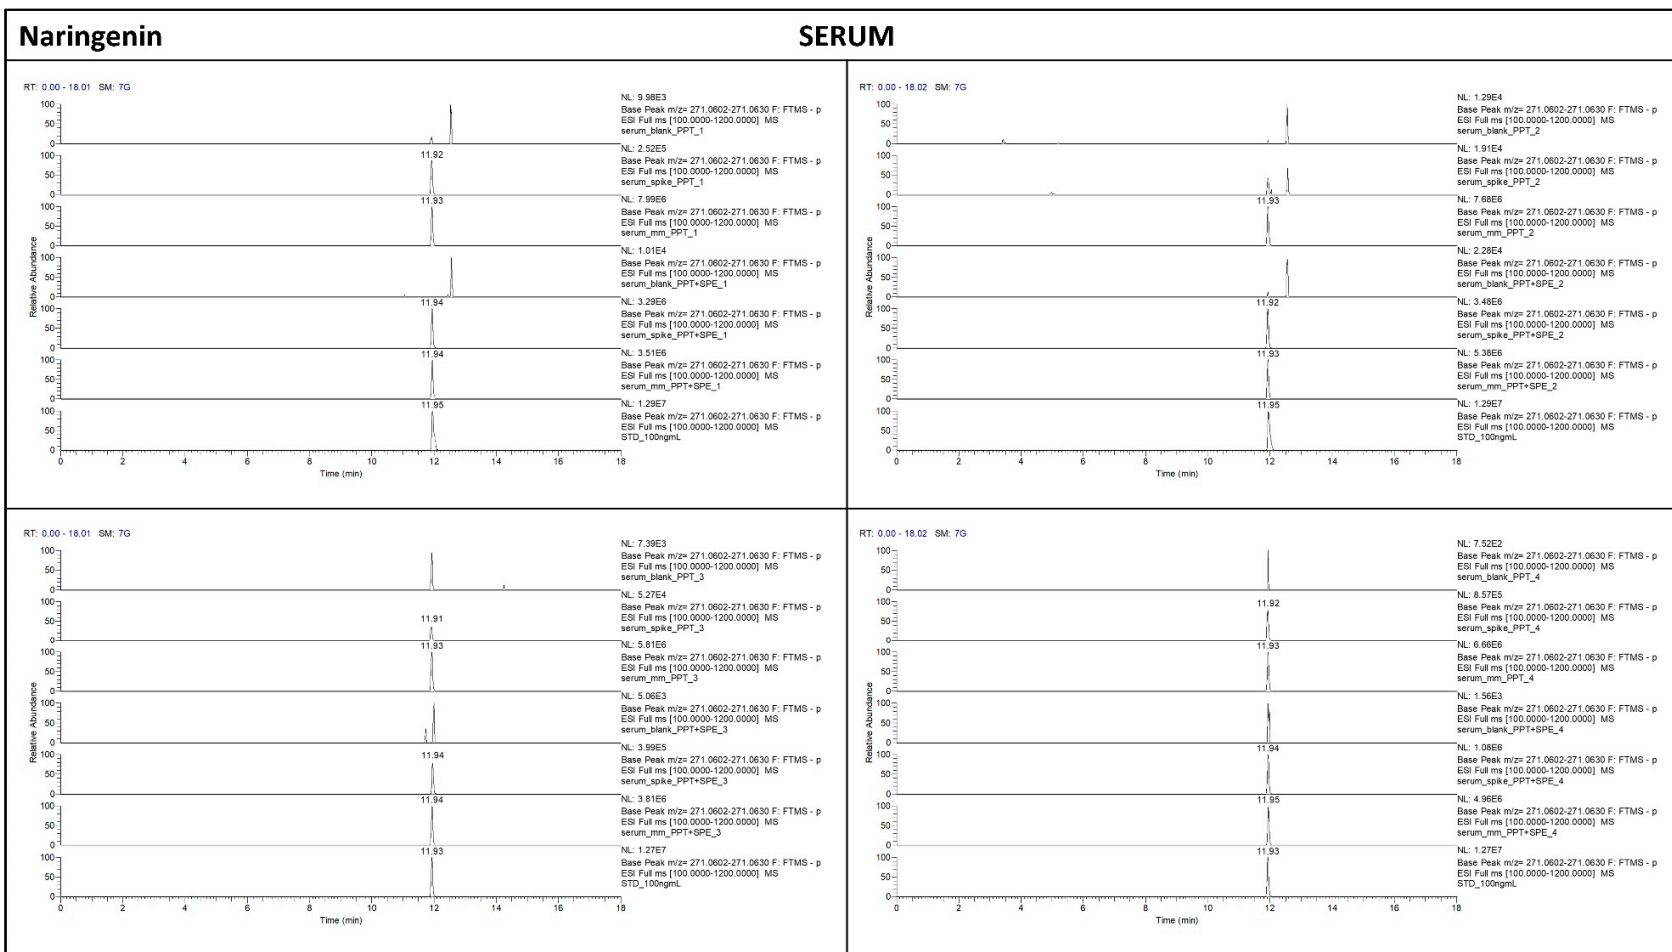

**Figure S2b.** Extracted ion chromatograms (XICs) of naringenin (11.95 min) for each pre-treatment method tested for serum samples.

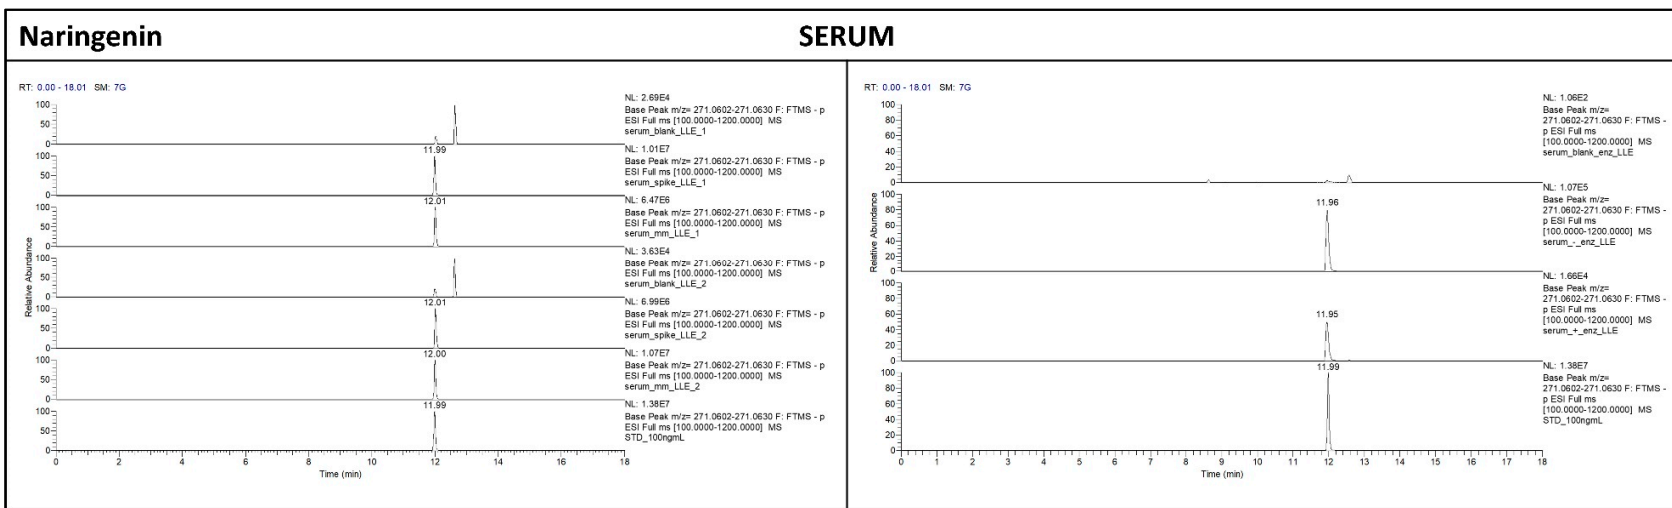

Figure S2b. (continued)

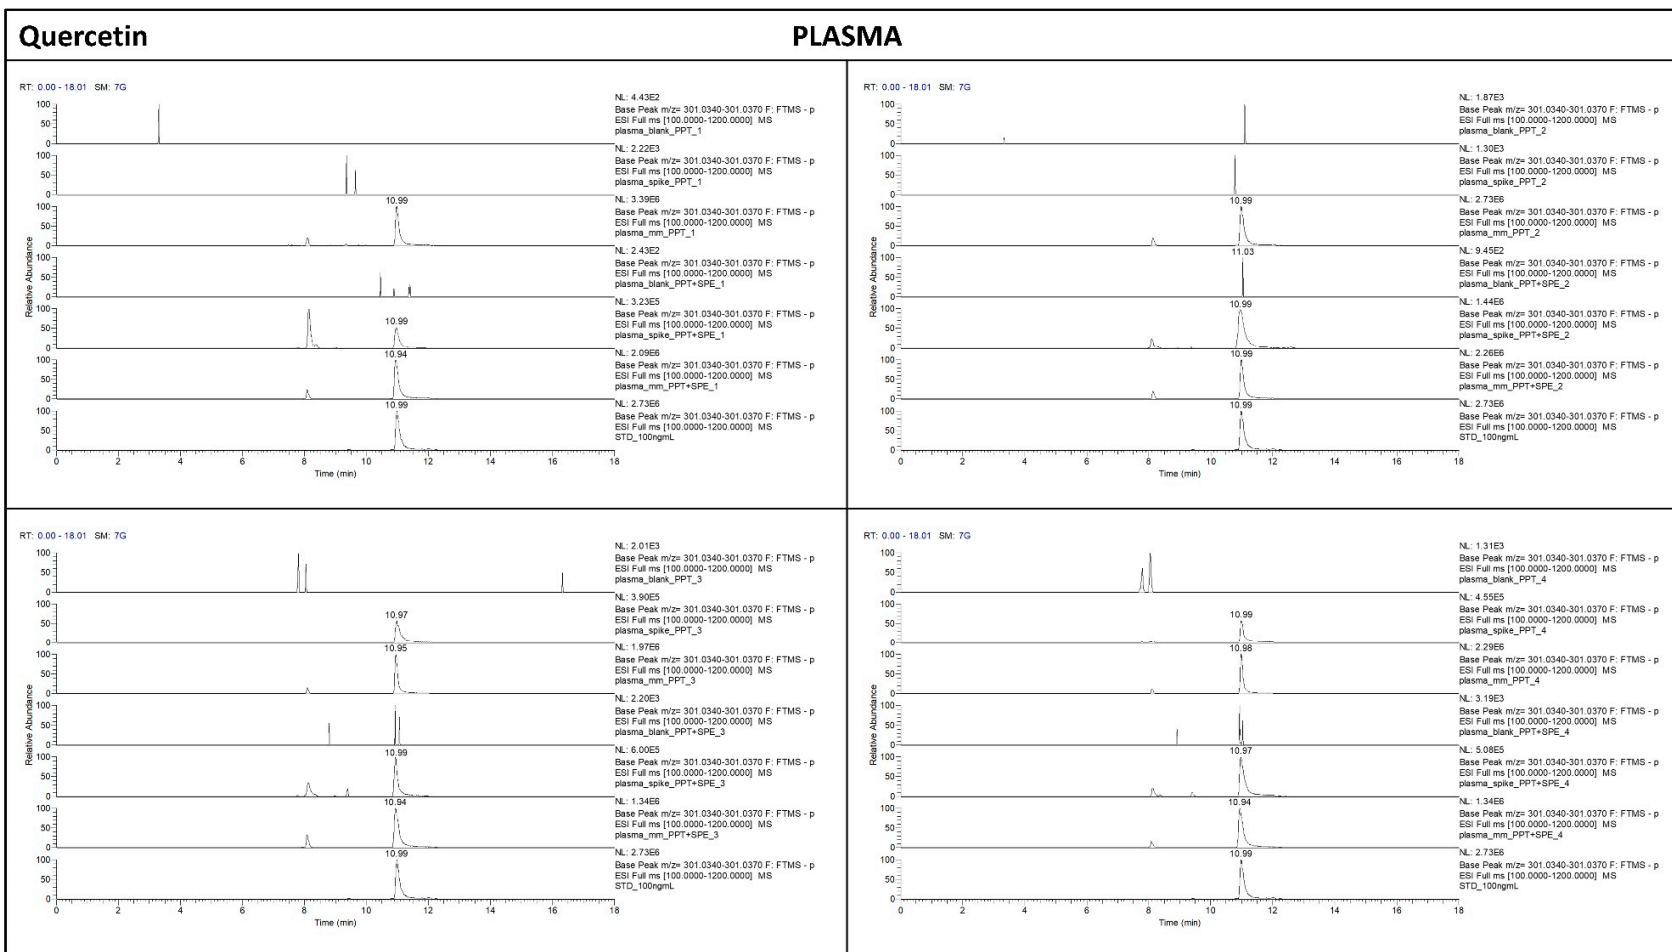

**Figure S3a.** Extracted ion chromatograms (XICs) of quercetin (10.99 min) for each pre-treatment method tested for plasma samples.



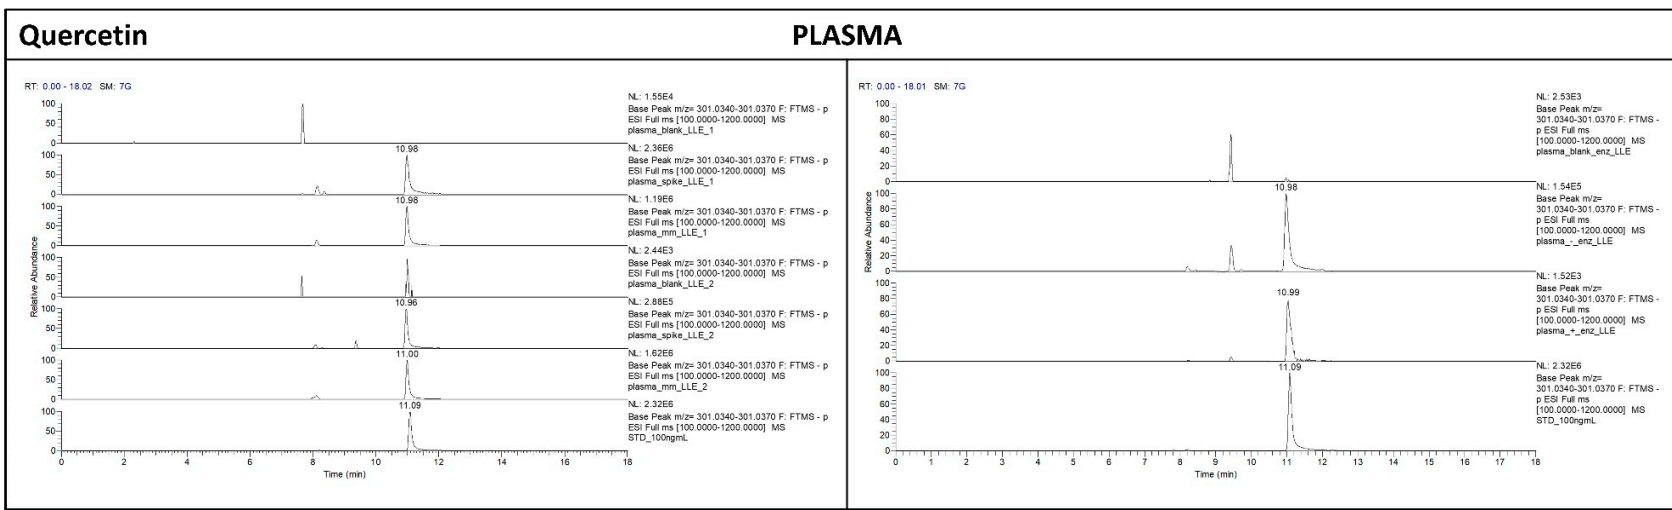

Figure S3a. (continued)

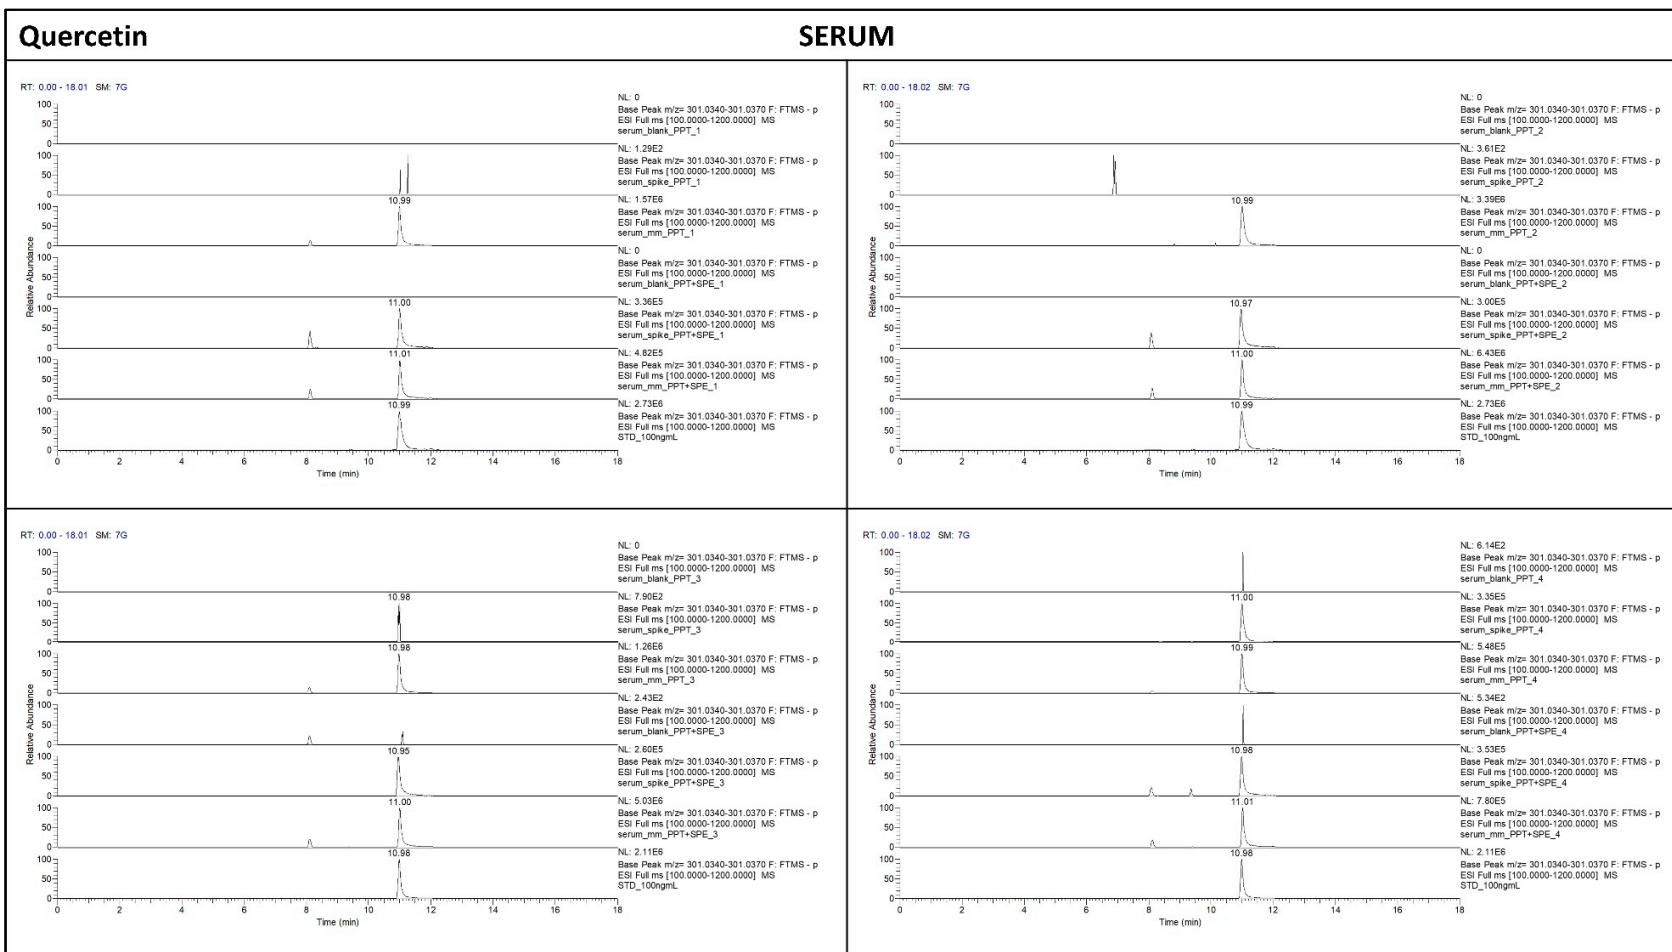

**Figure S3b.** Extracted ion chromatograms (XICs) of quercetin (10.99 min) for each pre-treatment method tested for serum samples.

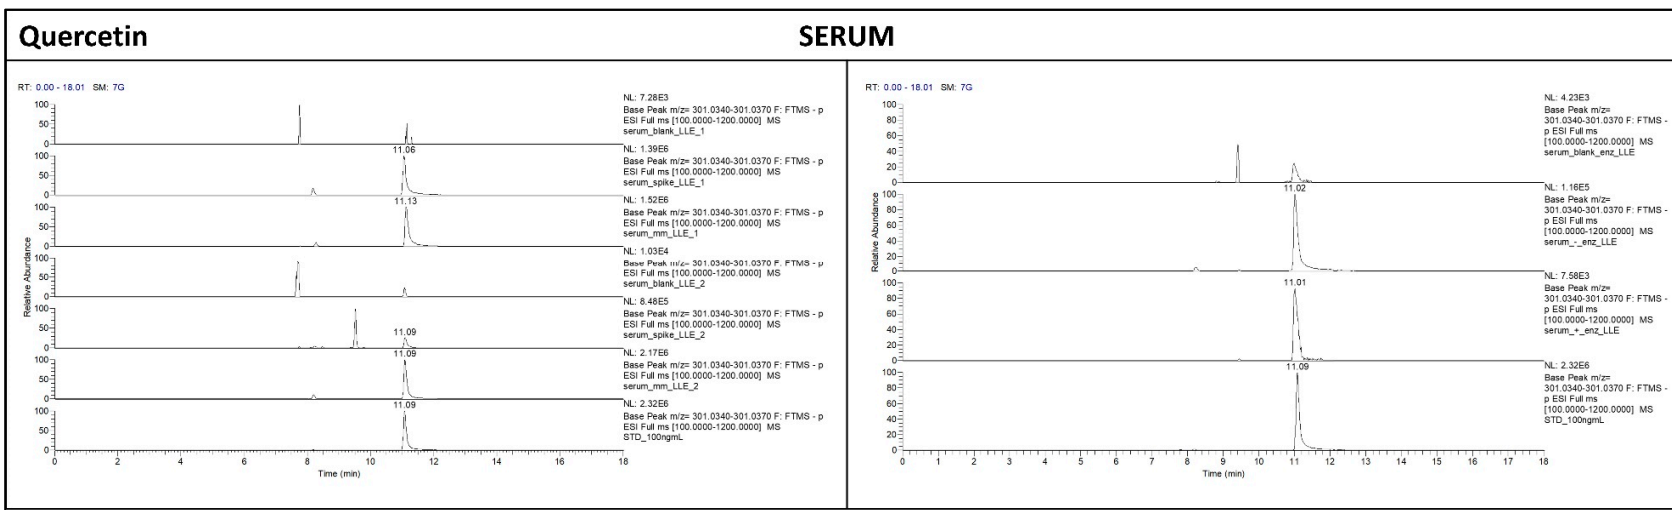

Figure S3b. (continued)

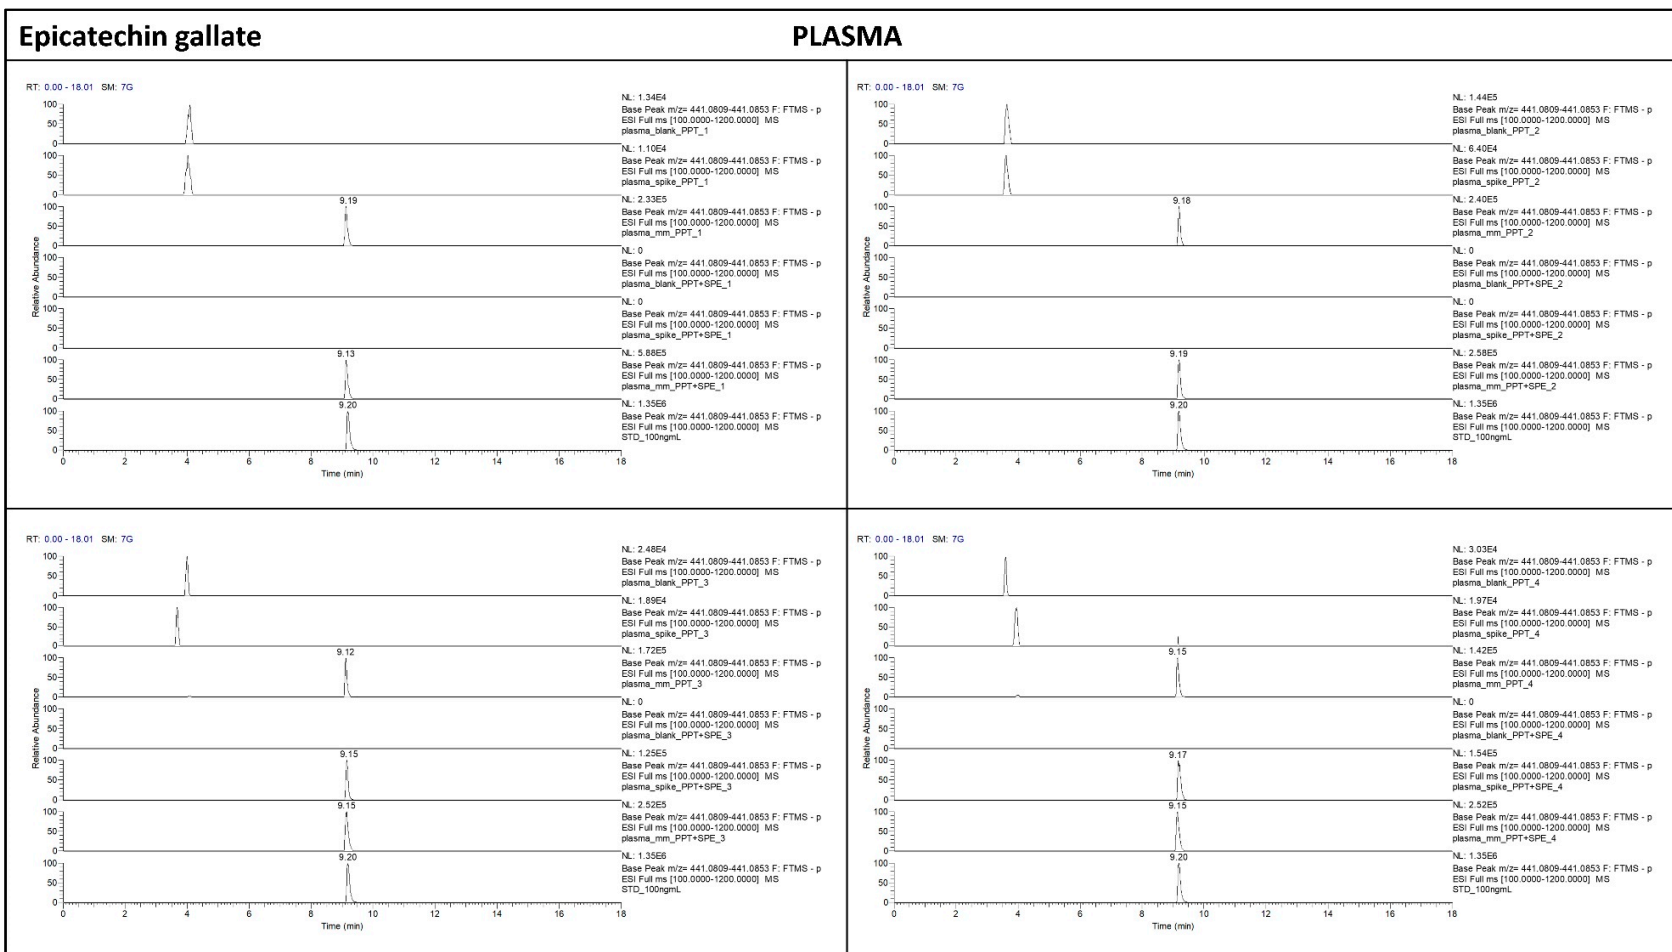

**Figure S4a.** Extracted ion chromatograms (XICs) of epicatechin gallate (9.20 min) for each pre-treatment method tested for plasma samples.

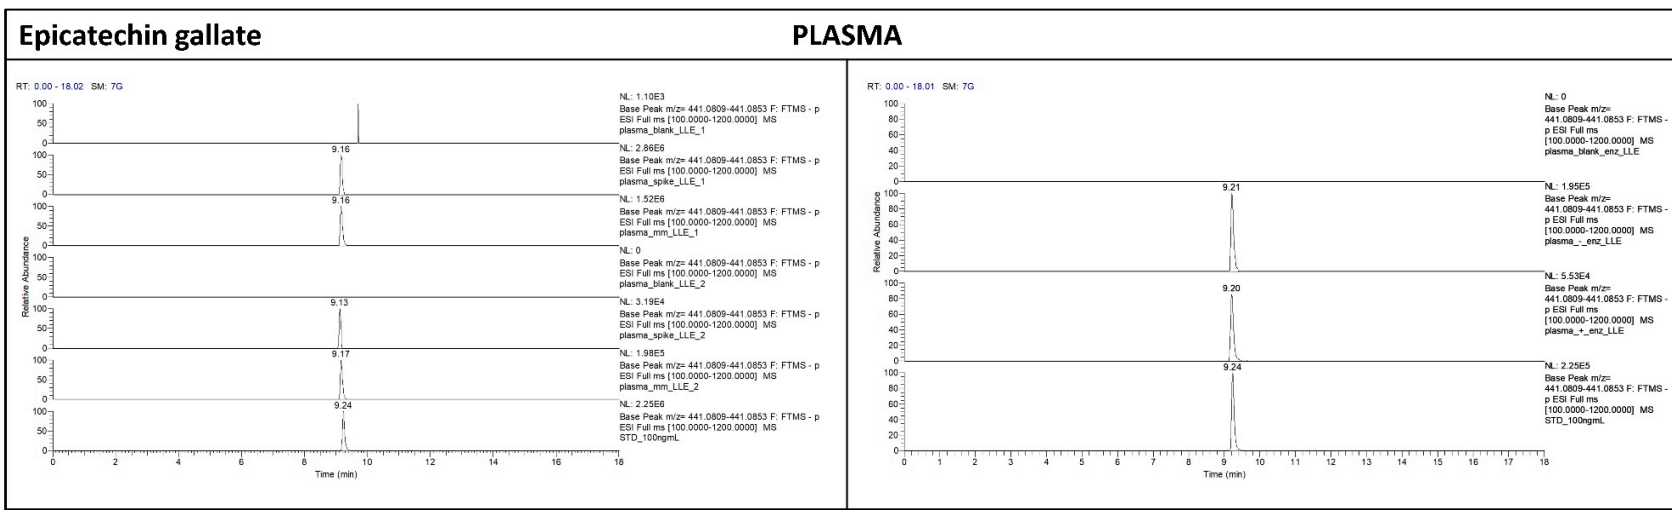

Figure S4a. (continued)

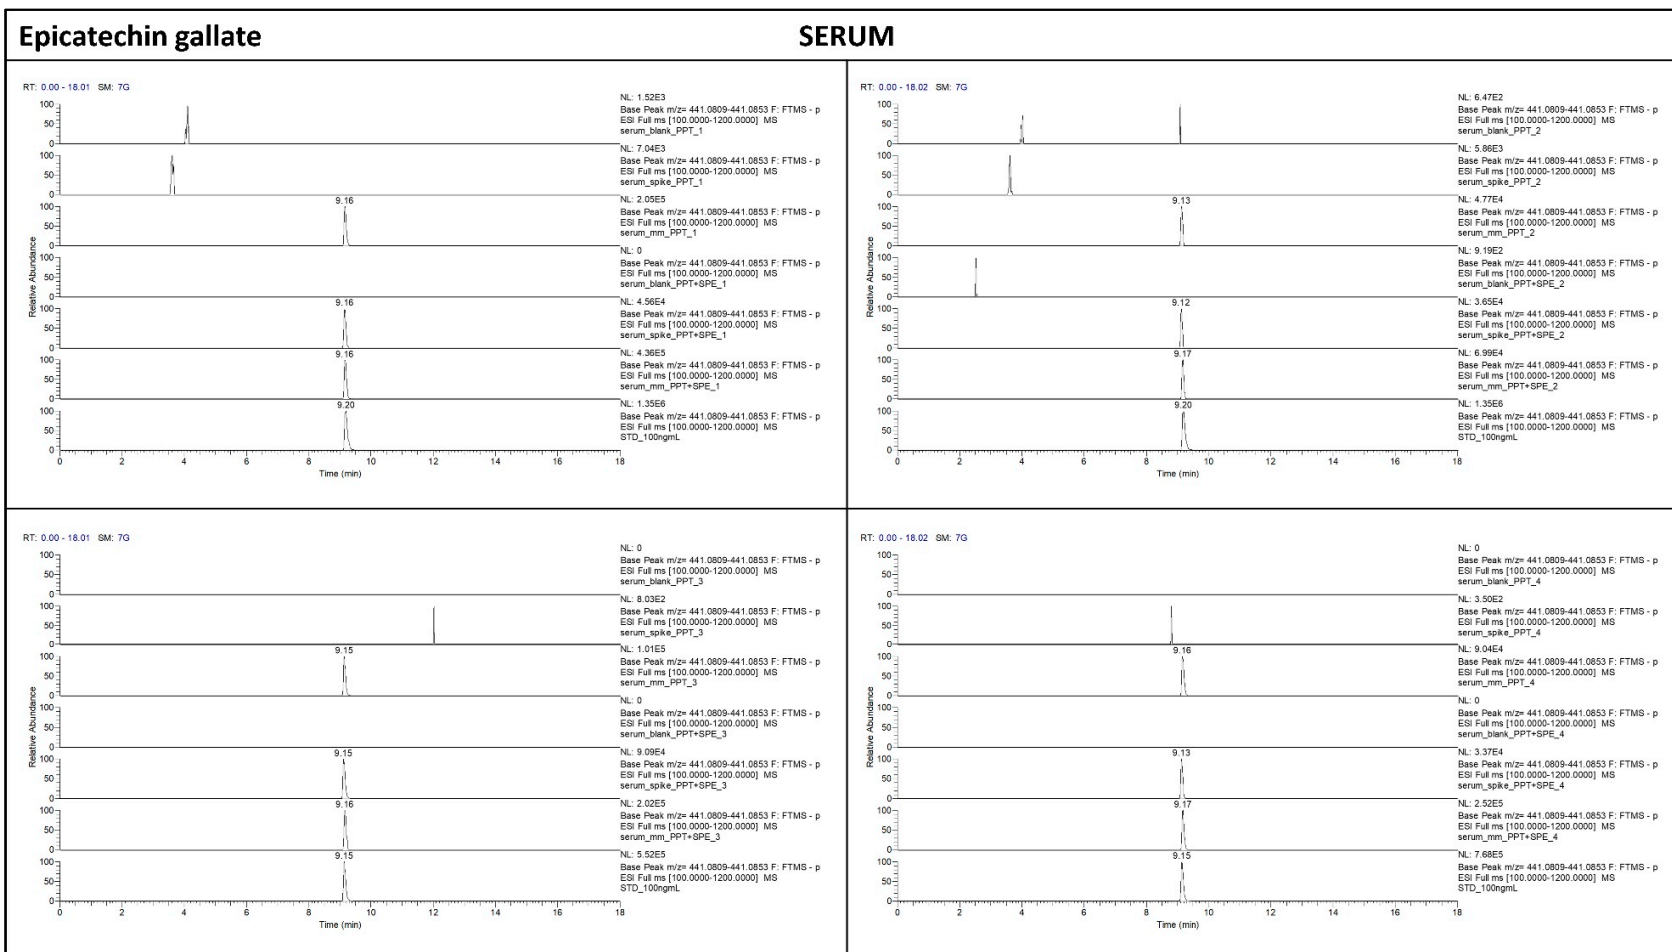

**Figure S4b.** Extracted ion chromatograms (XICs) of epicatechin gallate (9.20 min) for each pre-treatment method tested for serum samples.

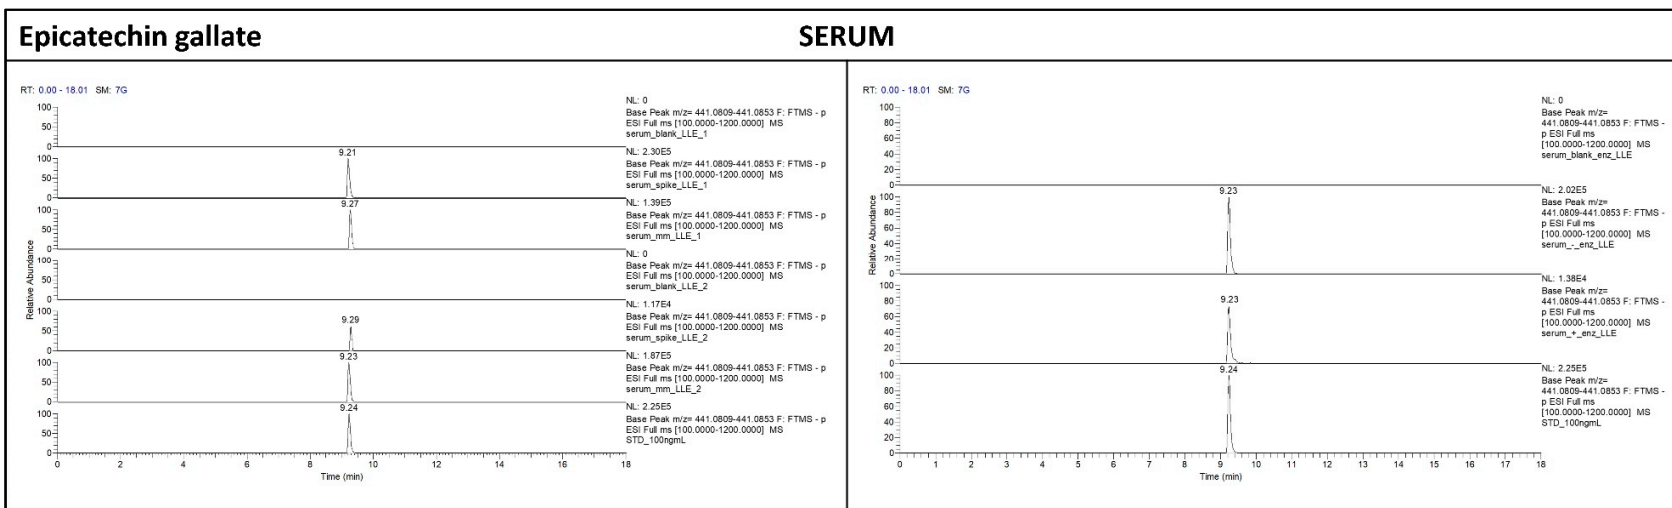

Figure S4b. (continued)

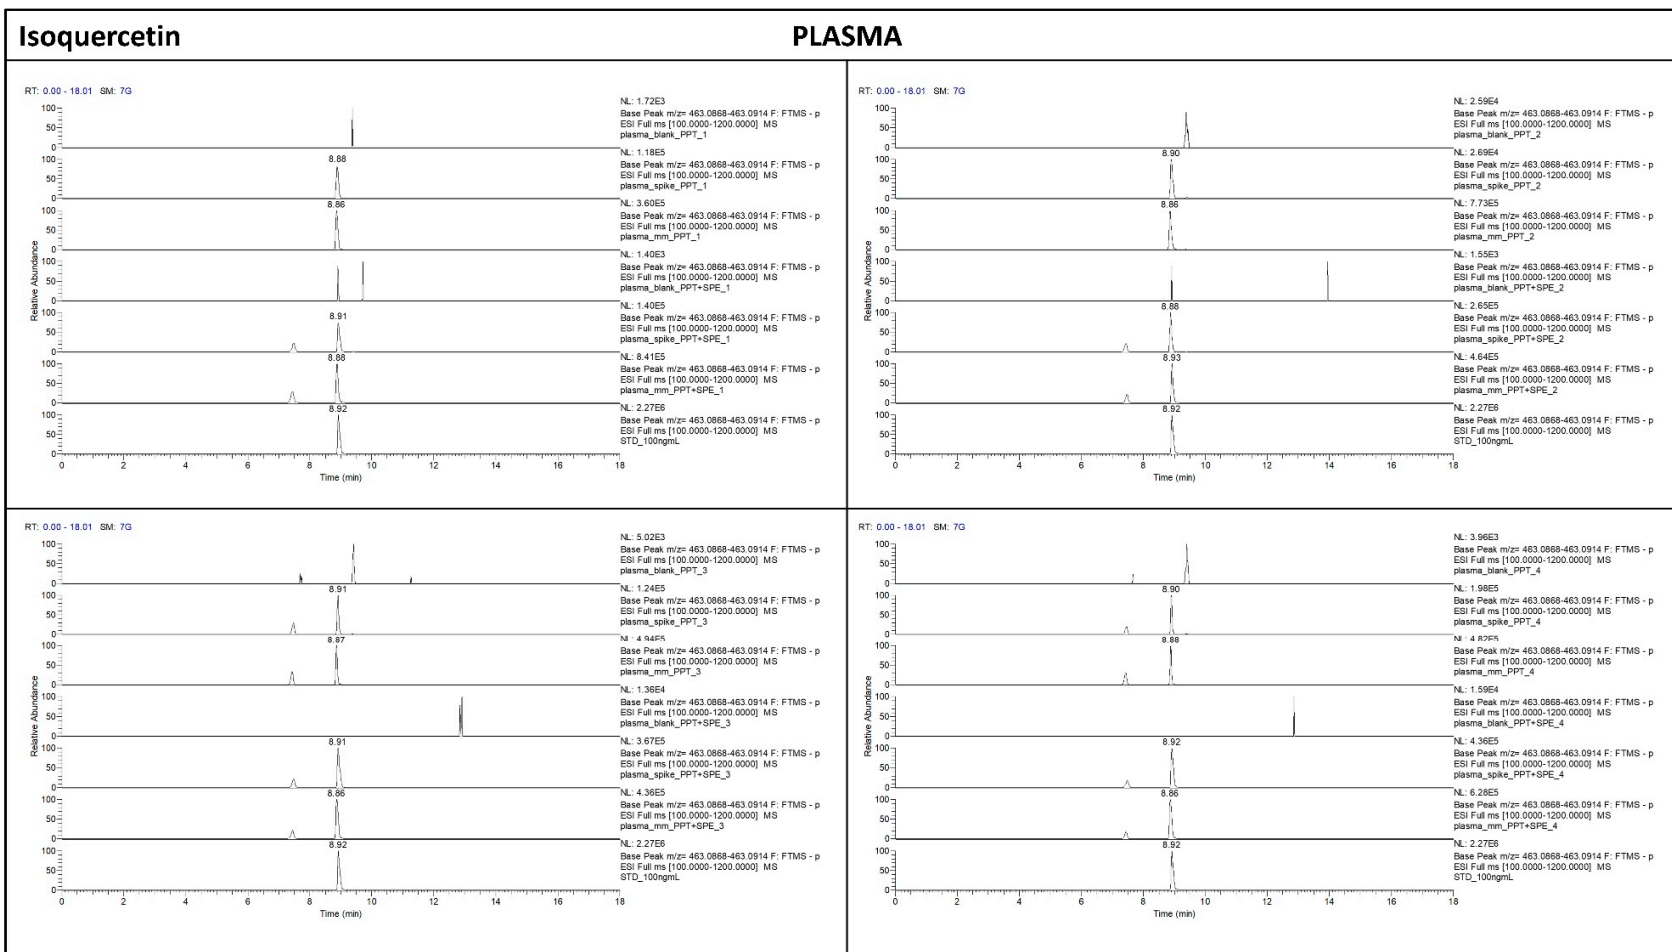

**Figure S5a.** Extracted ion chromatograms (XICs) of isoquercetin (8.92 min) for each pre-treatment method tested for plasma samples.



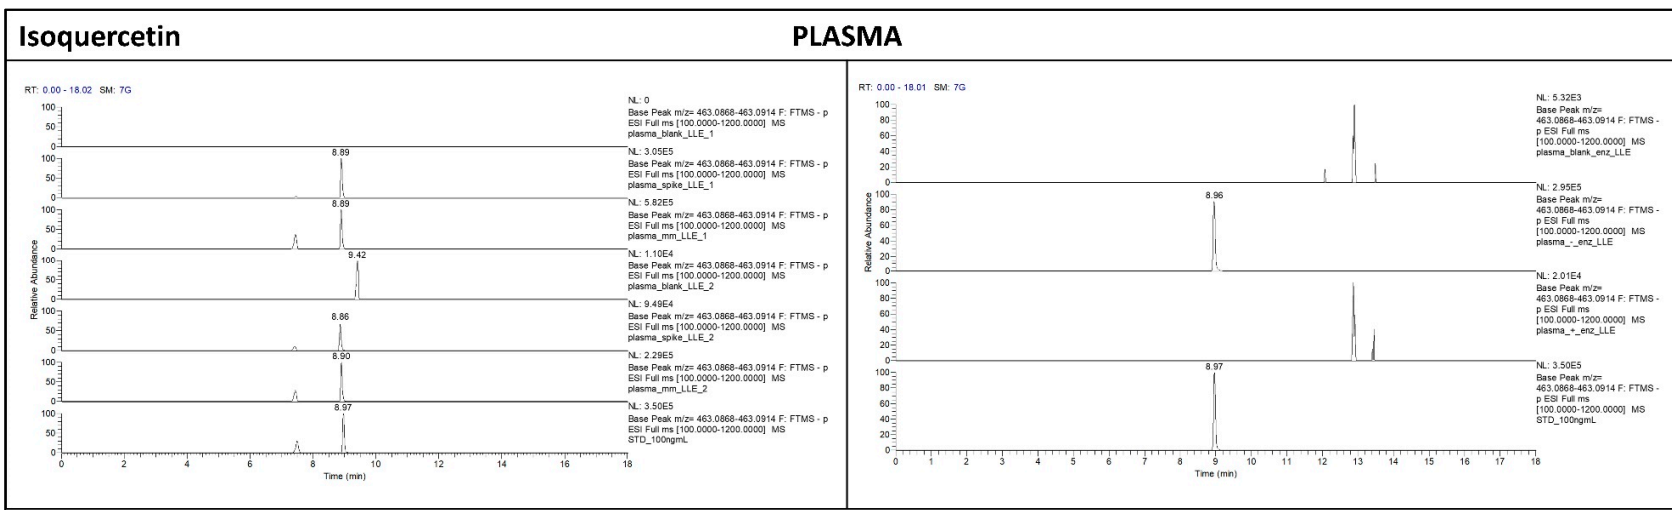

Figure S5a. (continued)

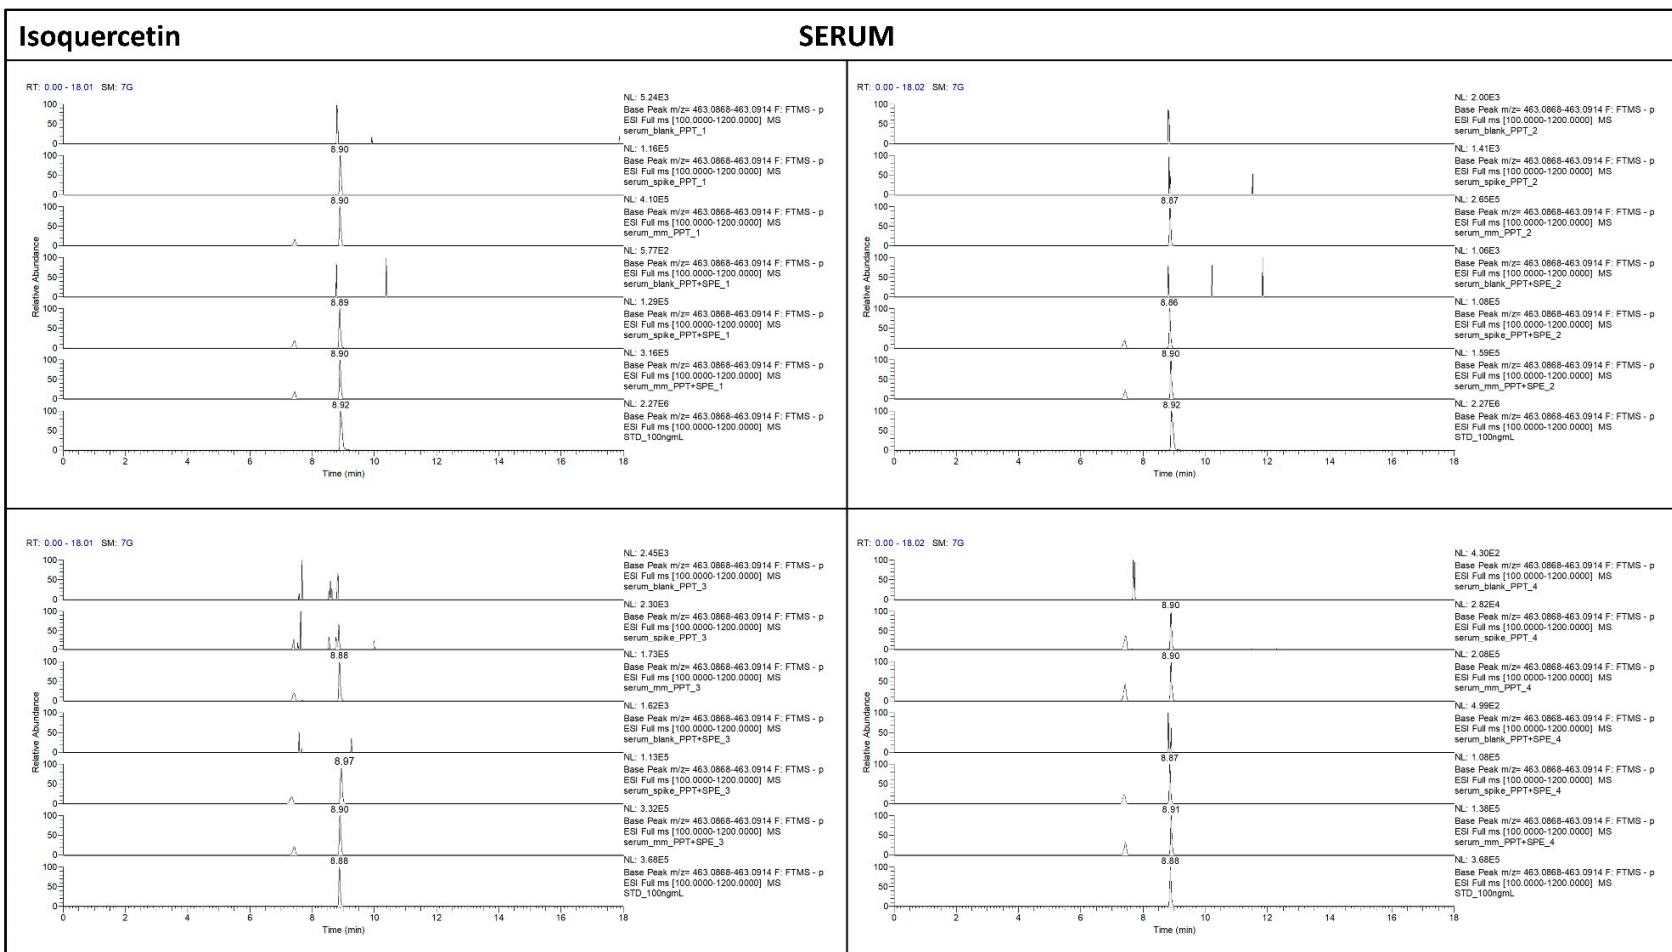

**Figure S5b.** Extracted ion chromatograms (XICs) of isoquercetin (8.92 min) for each pre-treatment method tested for serum samples.

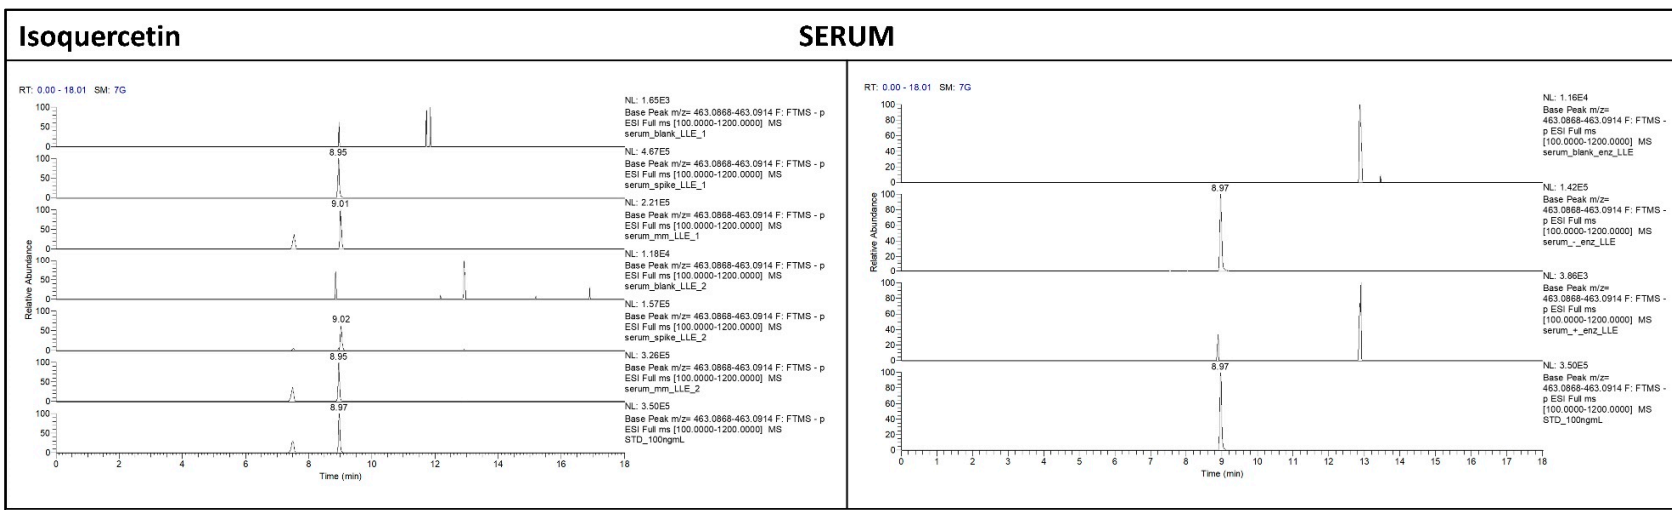

Figure S5b. (continued)

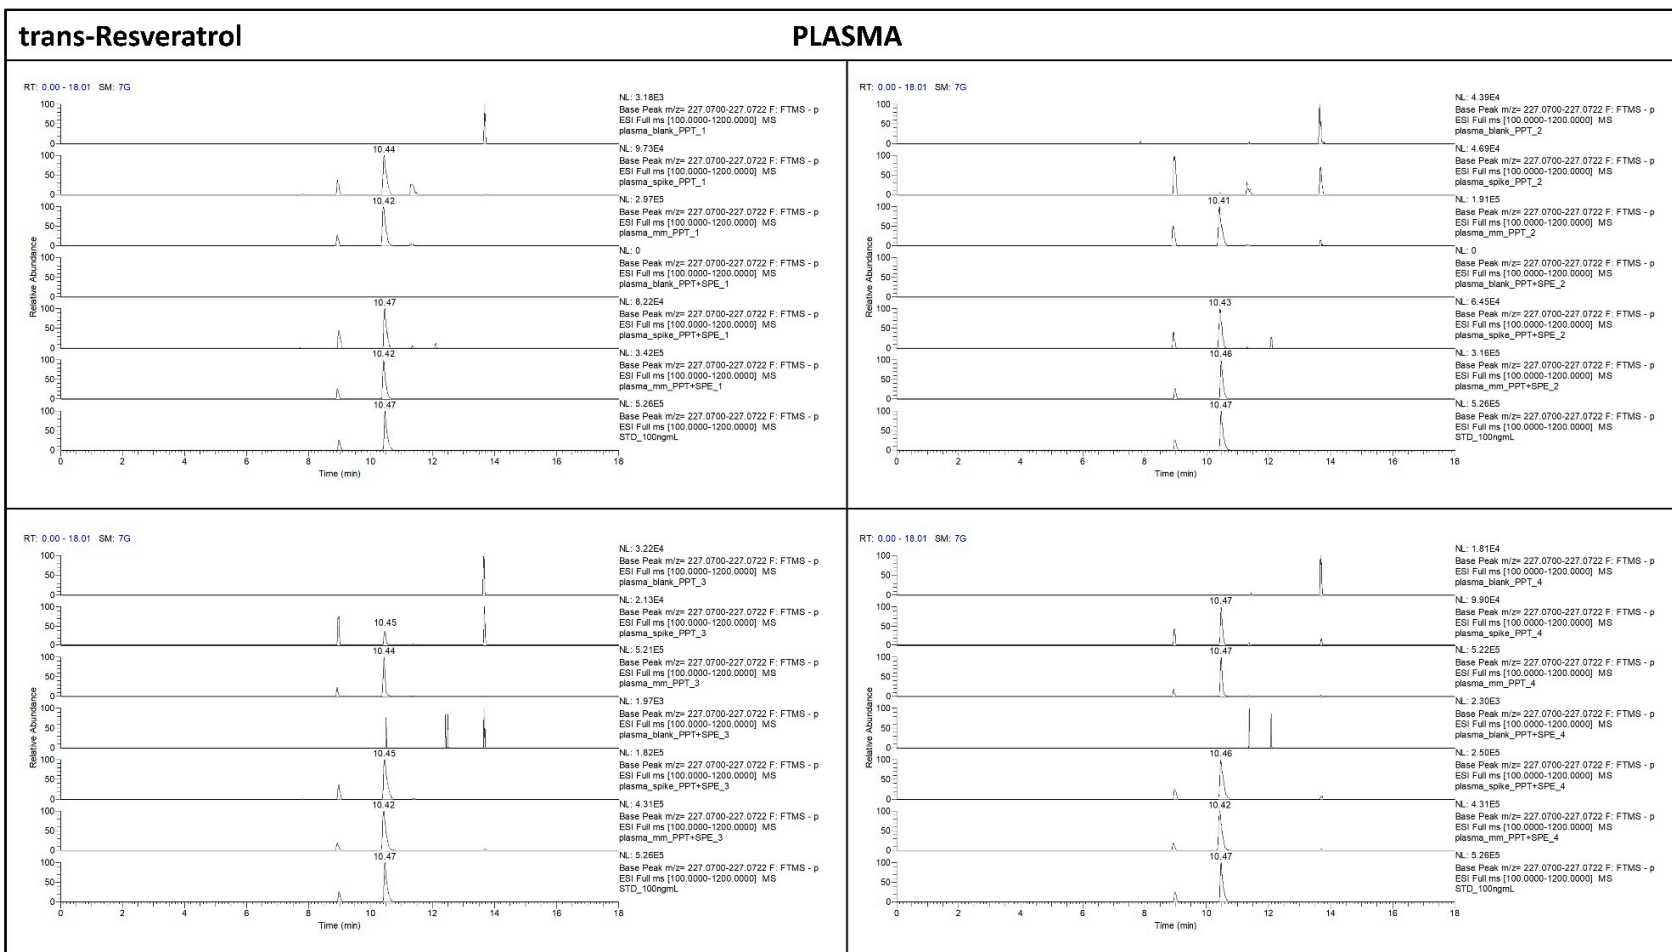

**Figure S6a.** Extracted ion chromatograms (XICs) of trans-resveratrol (10.47 min) for each pre-treatment method tested for plasma samples.

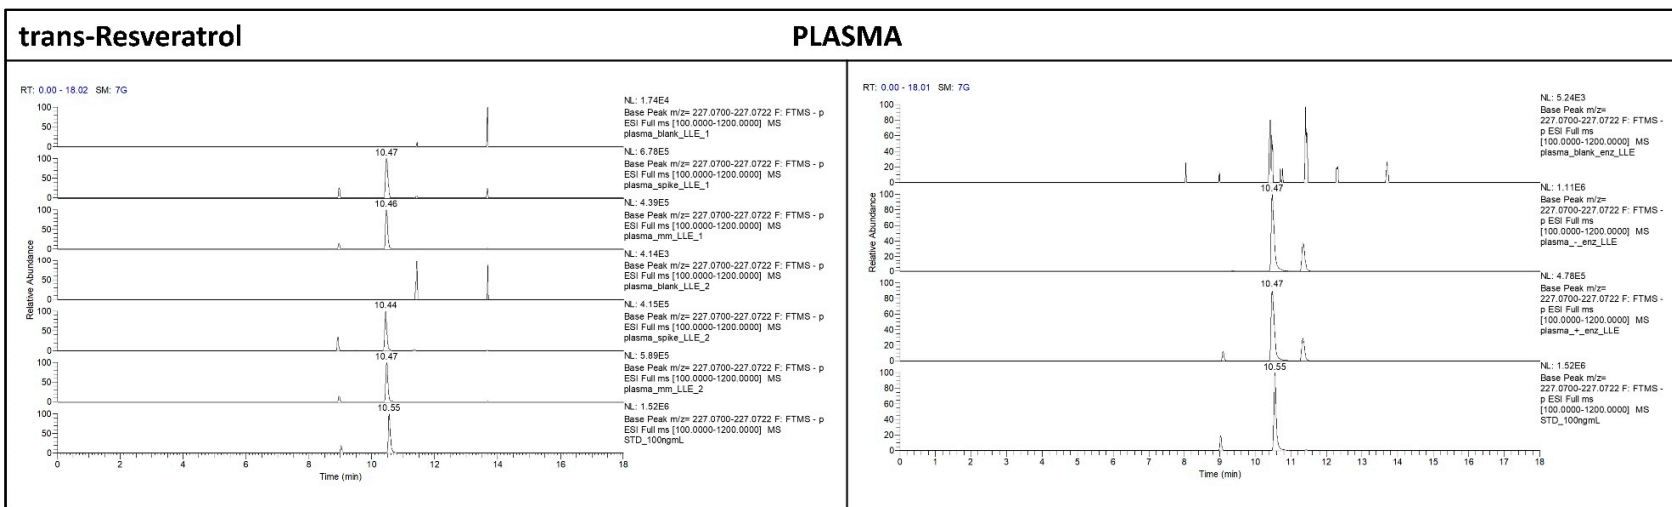

Figure S6a. (continued)

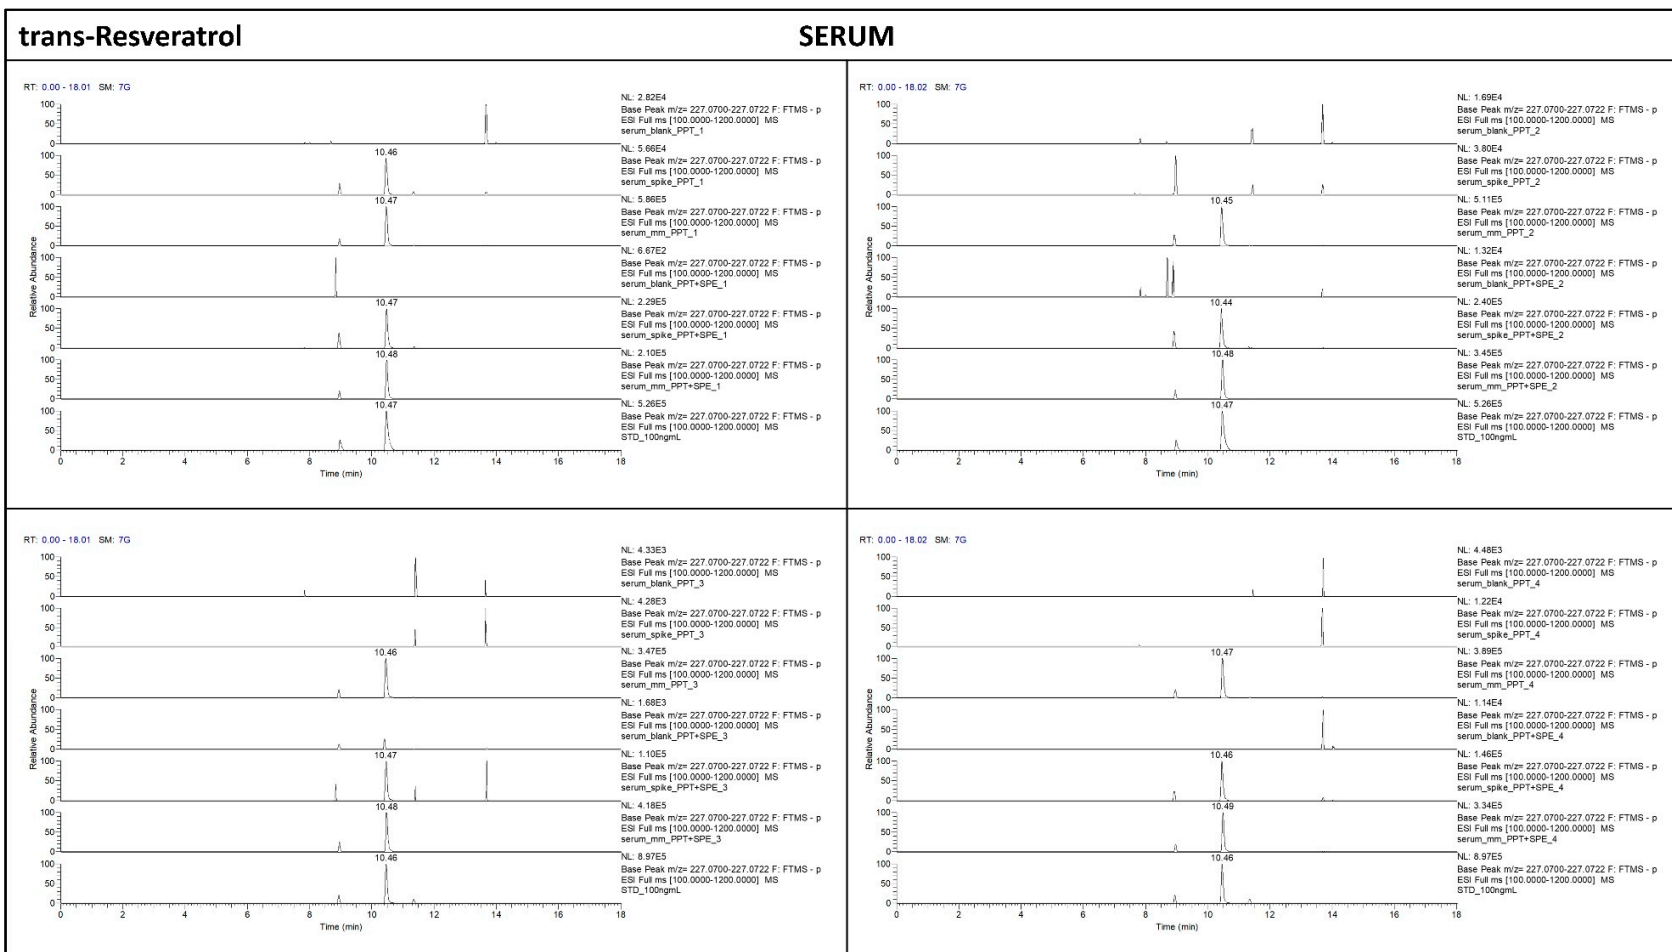

**Figure S6b.** Extracted ion chromatograms (XICs) of trans-resveratrol (10.47 min) for each pre-treatment method tested for serum samples.

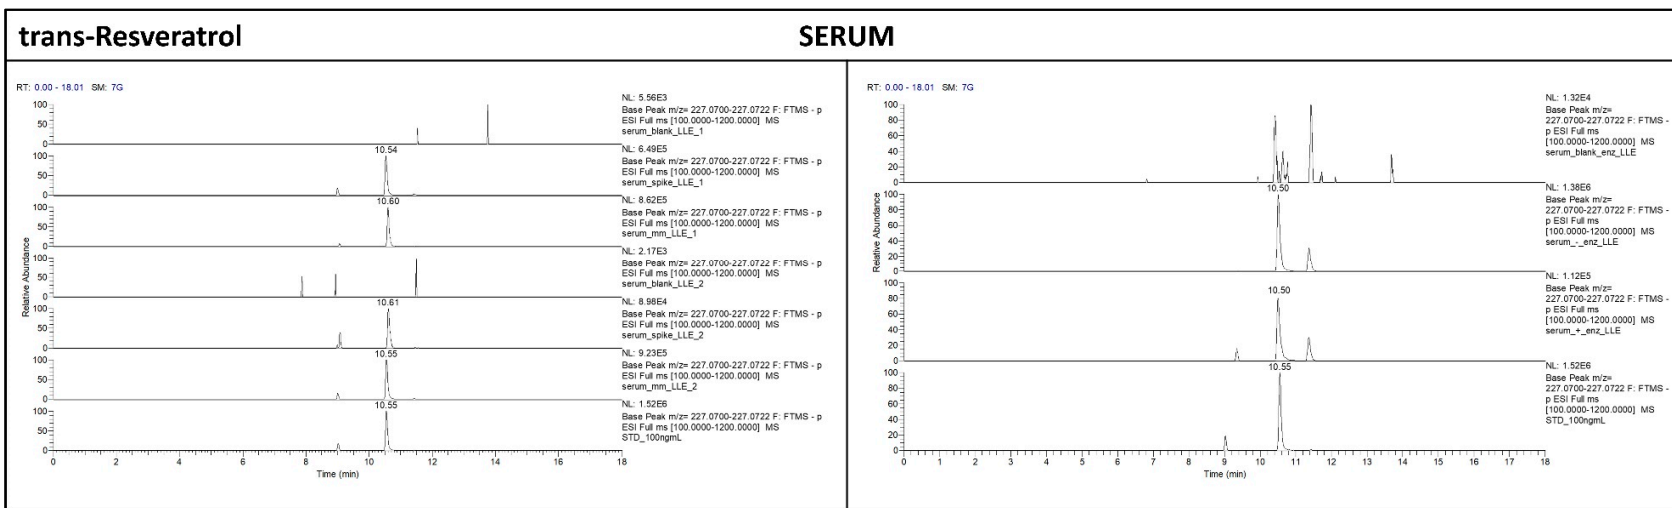

Figure S6b. (continued)

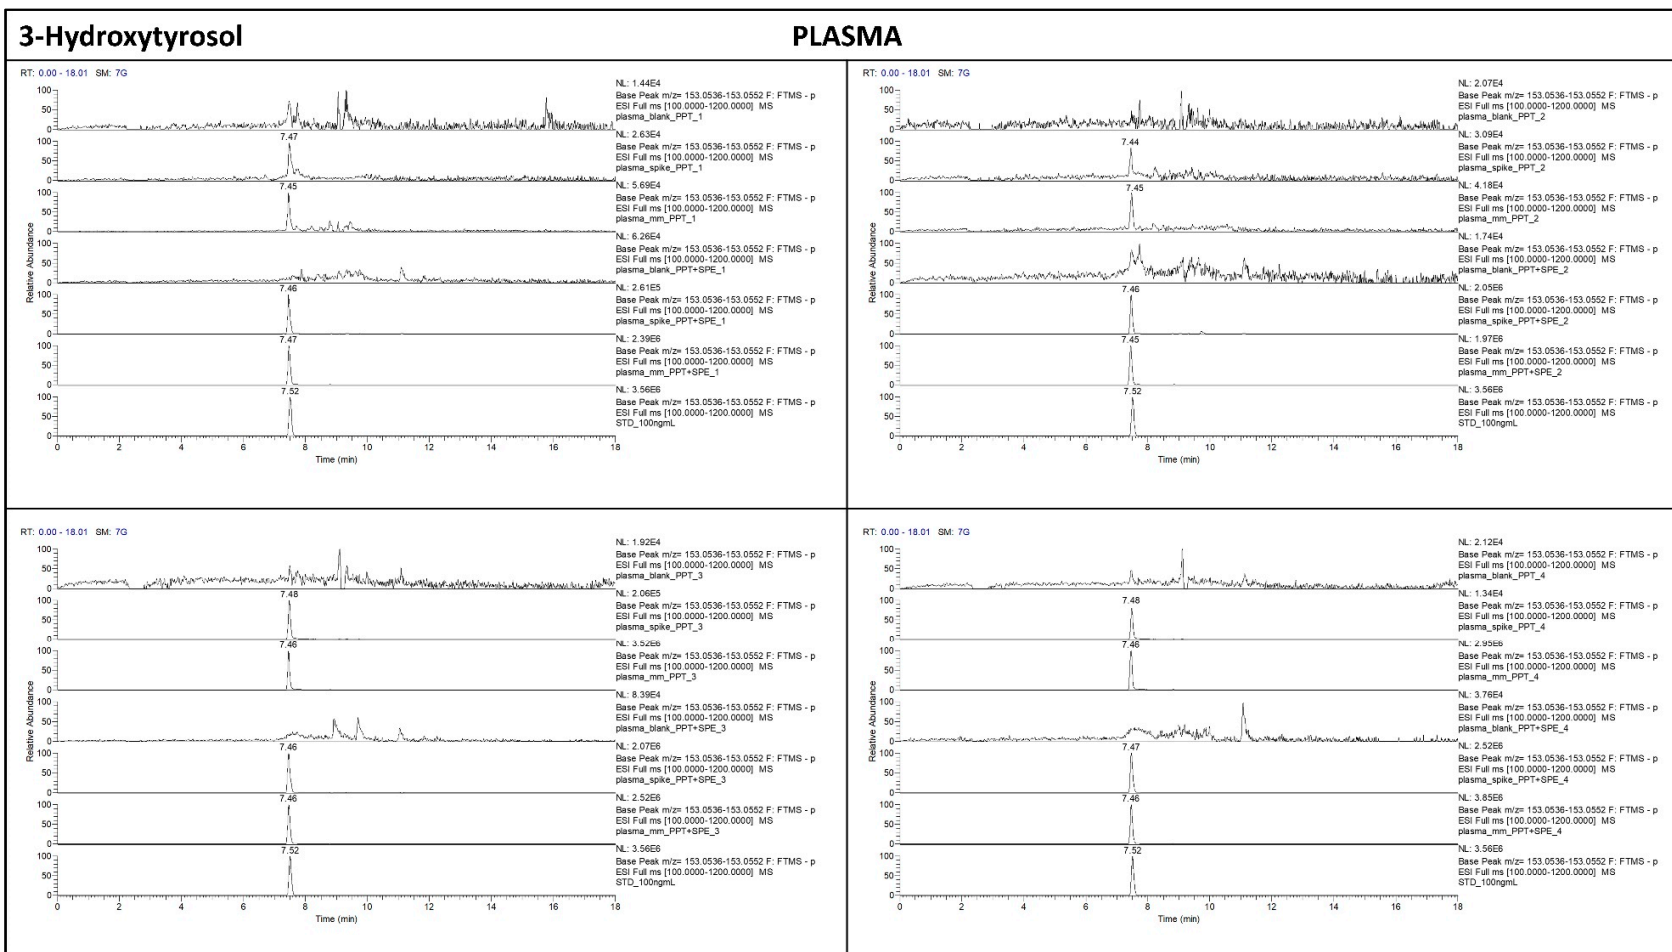

**Figure S7a.** Extracted ion chromatograms (XICs) of 3-hydroxytyrosol (7.50 min) for each pre-treatment method tested for plasma samples.



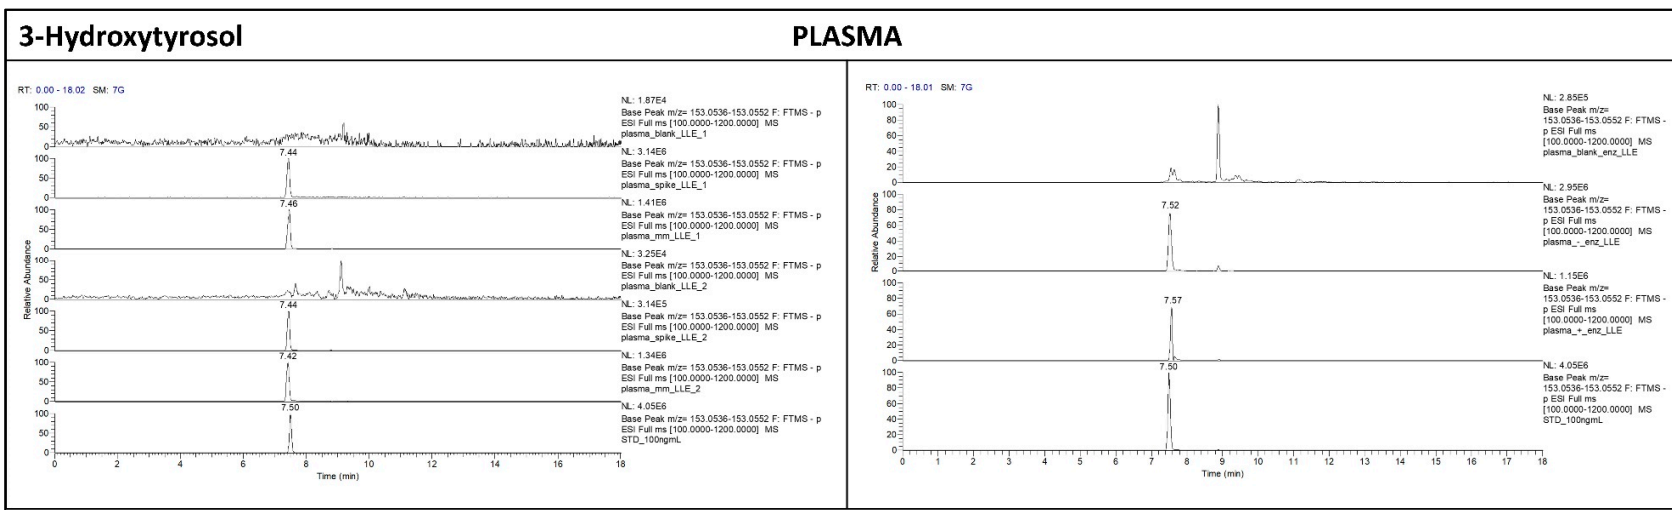

Figure S7a. (continued)

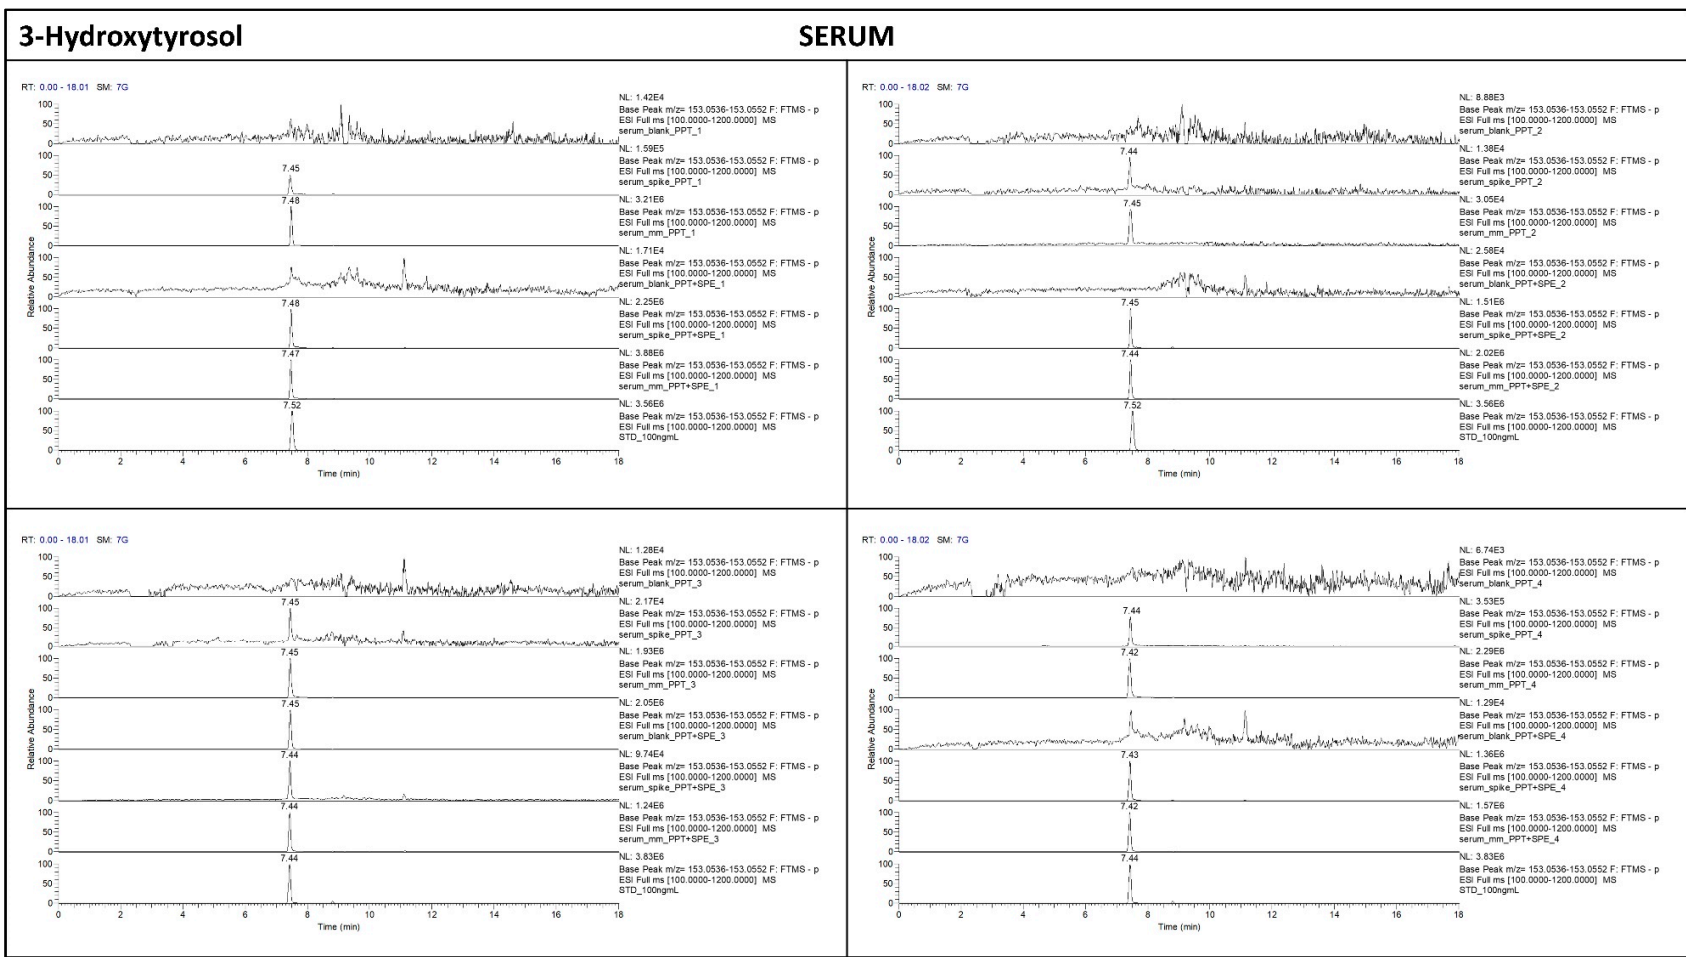

**Figure S7b.** Extracted ion chromatograms (XICs) of 3-hydroxytyrosol (7.50 min) for each pre-treatment method tested for serum samples.

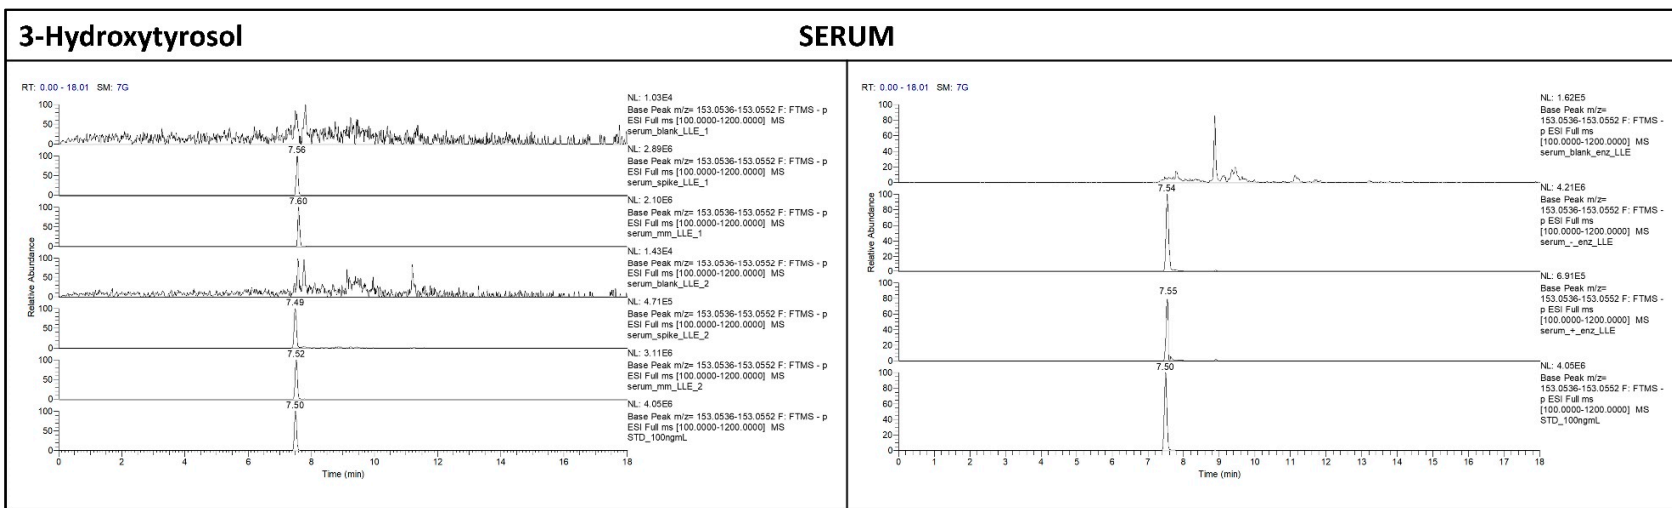

Figure S7b. (continued)

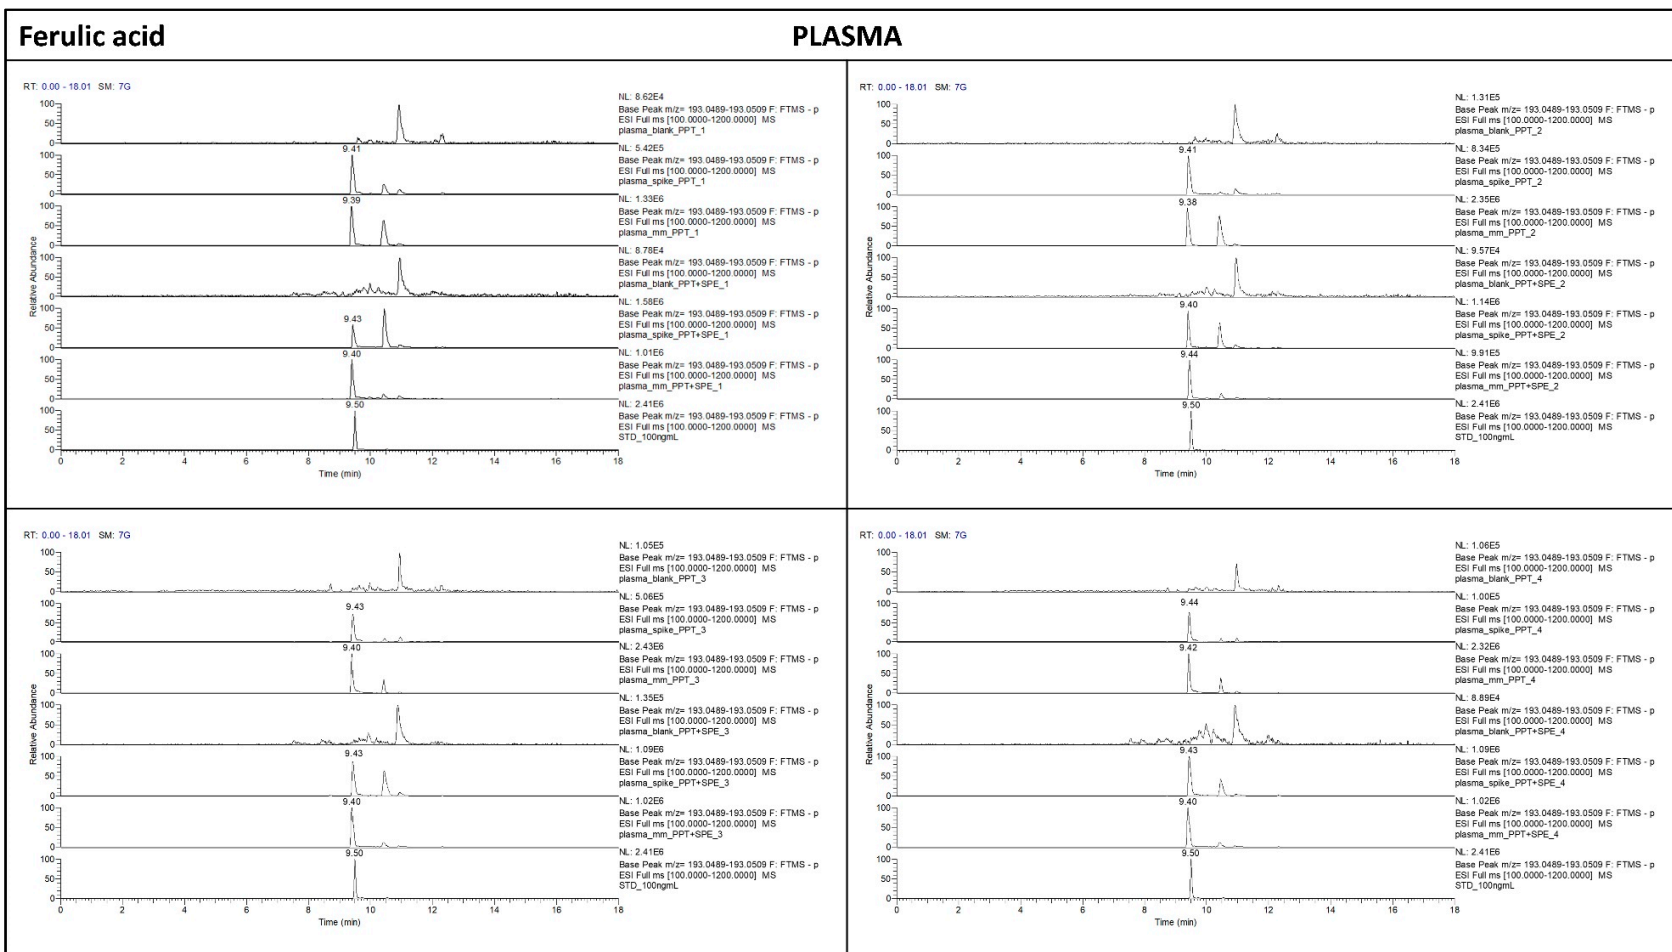

**Figure S8a.** Extracted ion chromatograms (XICs) of ferulic acid (9.50 min) for each pre-treatment method tested for plasma samples.

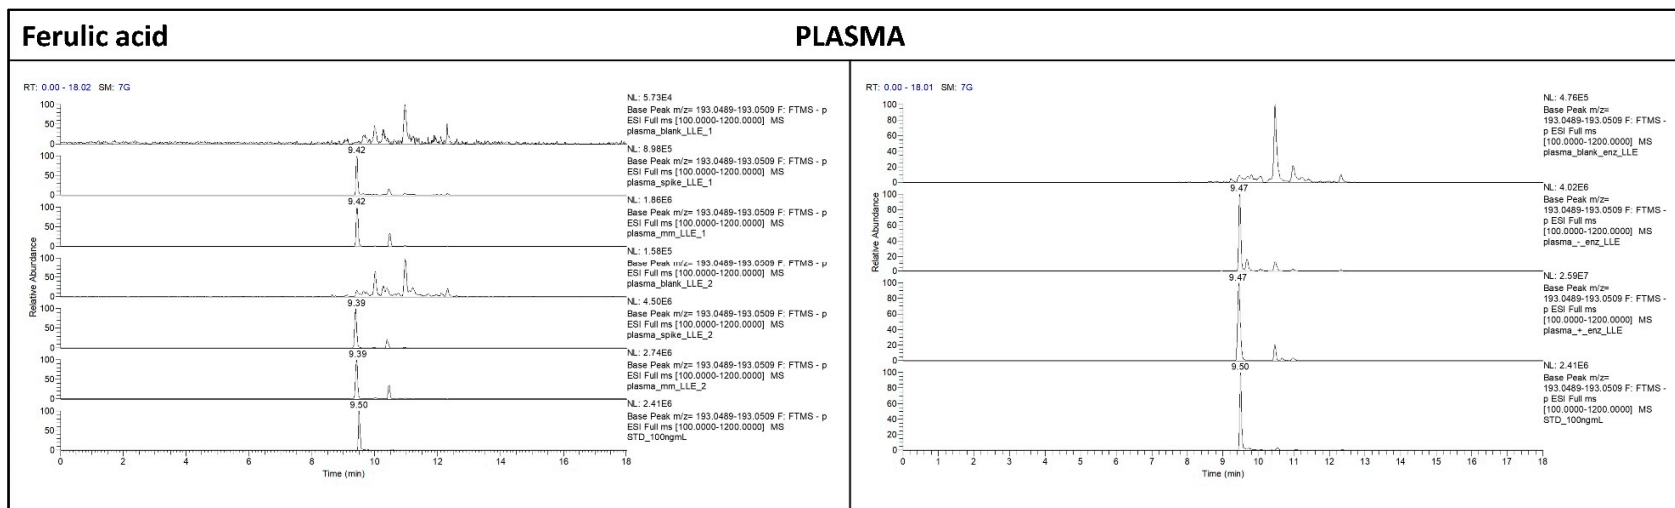

Figure S8a. (continued)

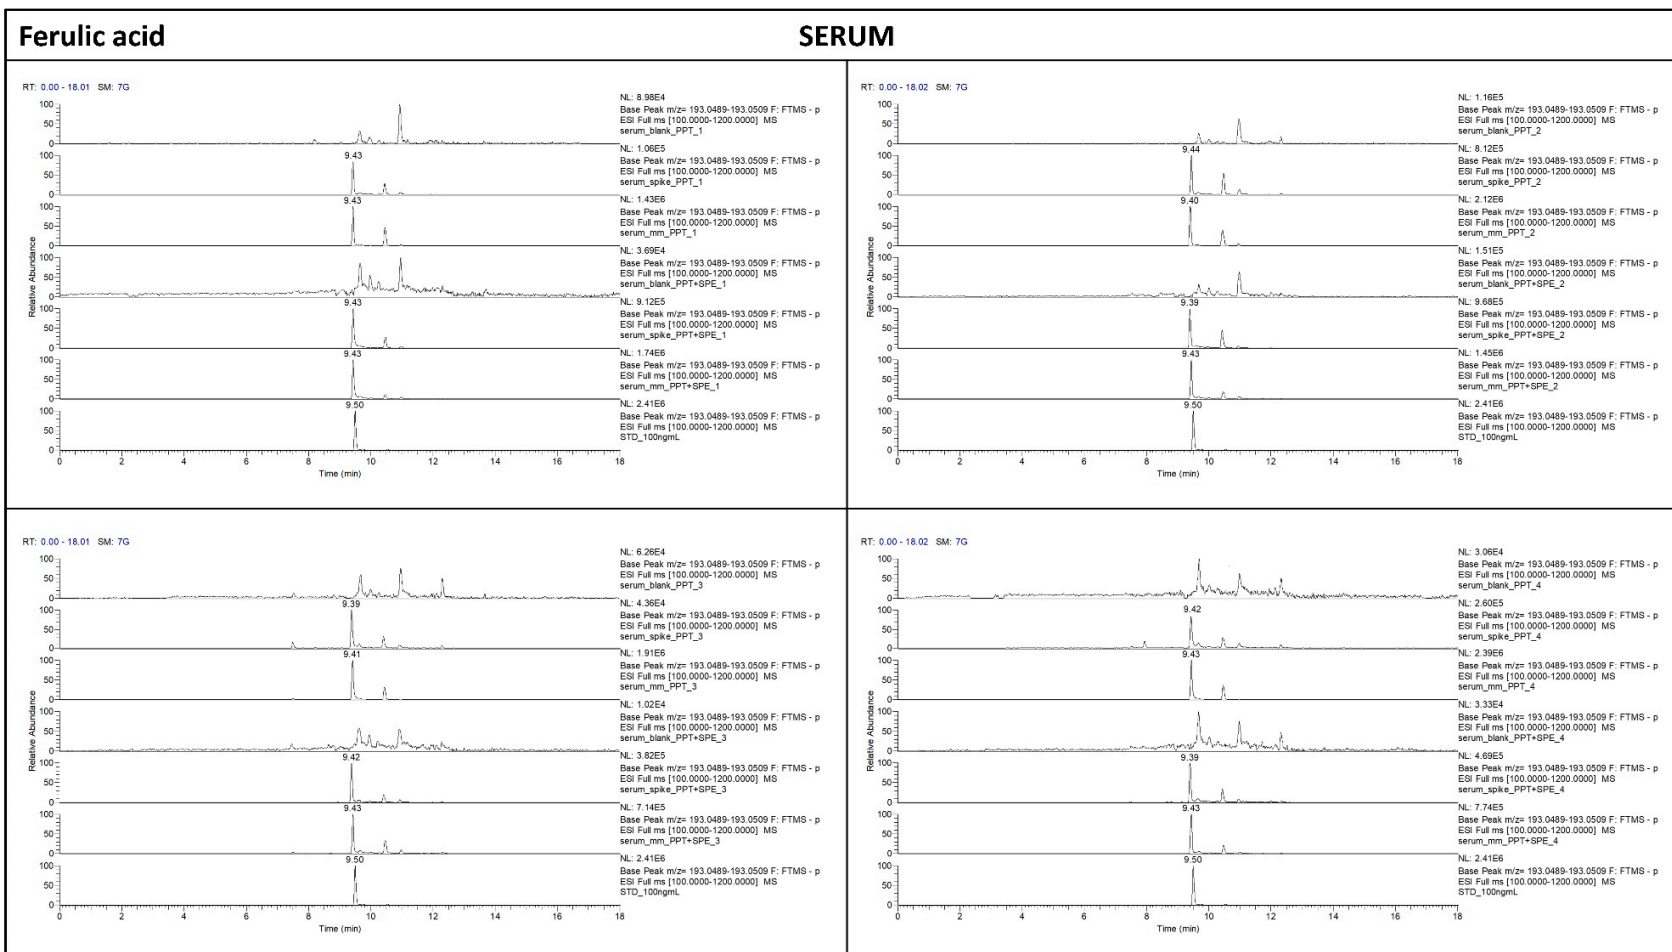

**Figure S8b.** Extracted ion chromatograms (XICs) of ferulic acid (9.50 min) for each pre-treatment method tested for serum samples.

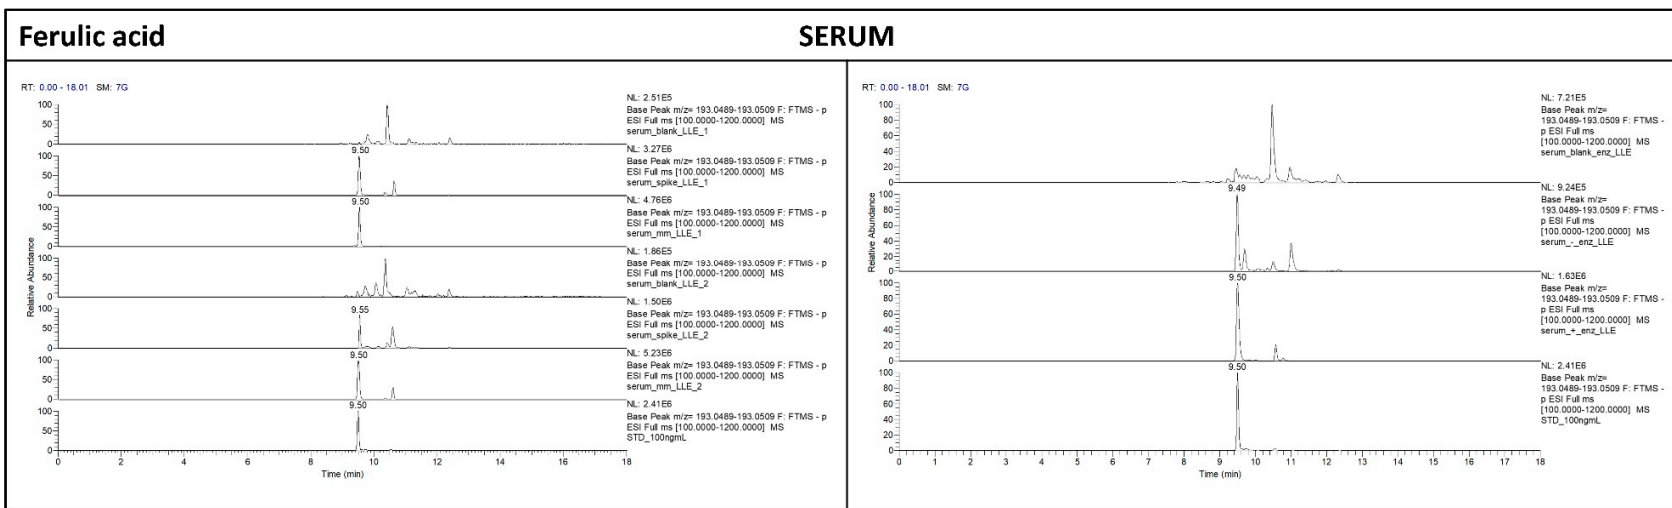

Figure S8b. (continued)

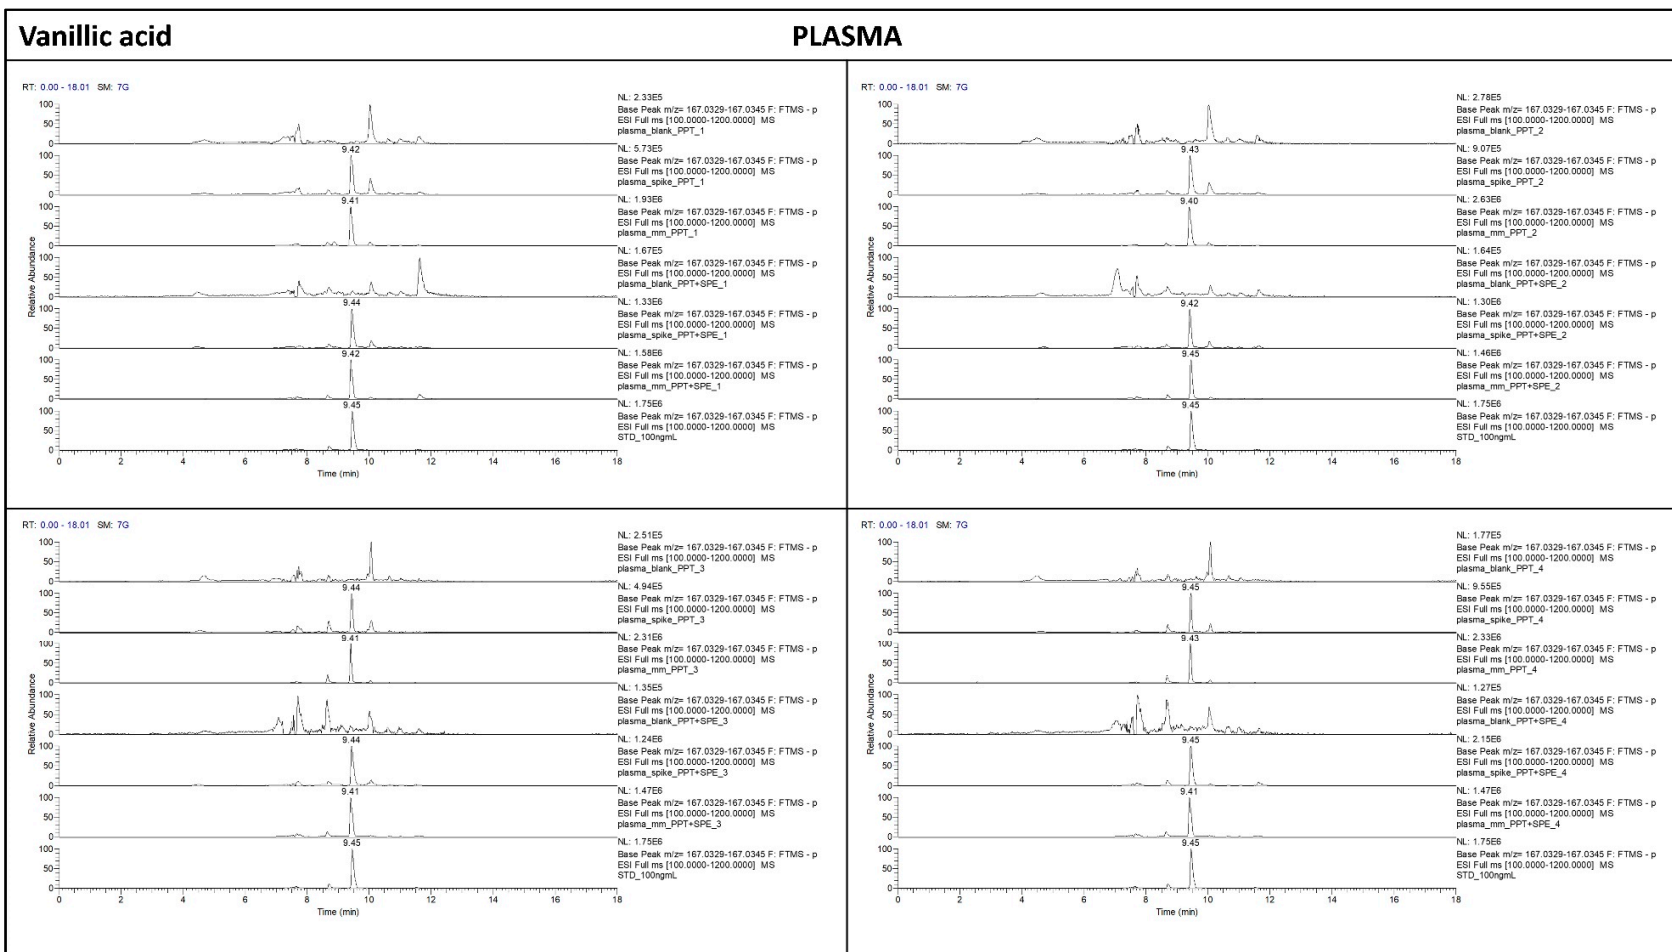

**Figure S9a.** Extracted ion chromatograms (XICs) of vanillic acid (9.50 min) for each pre-treatment method tested for plasma samples.



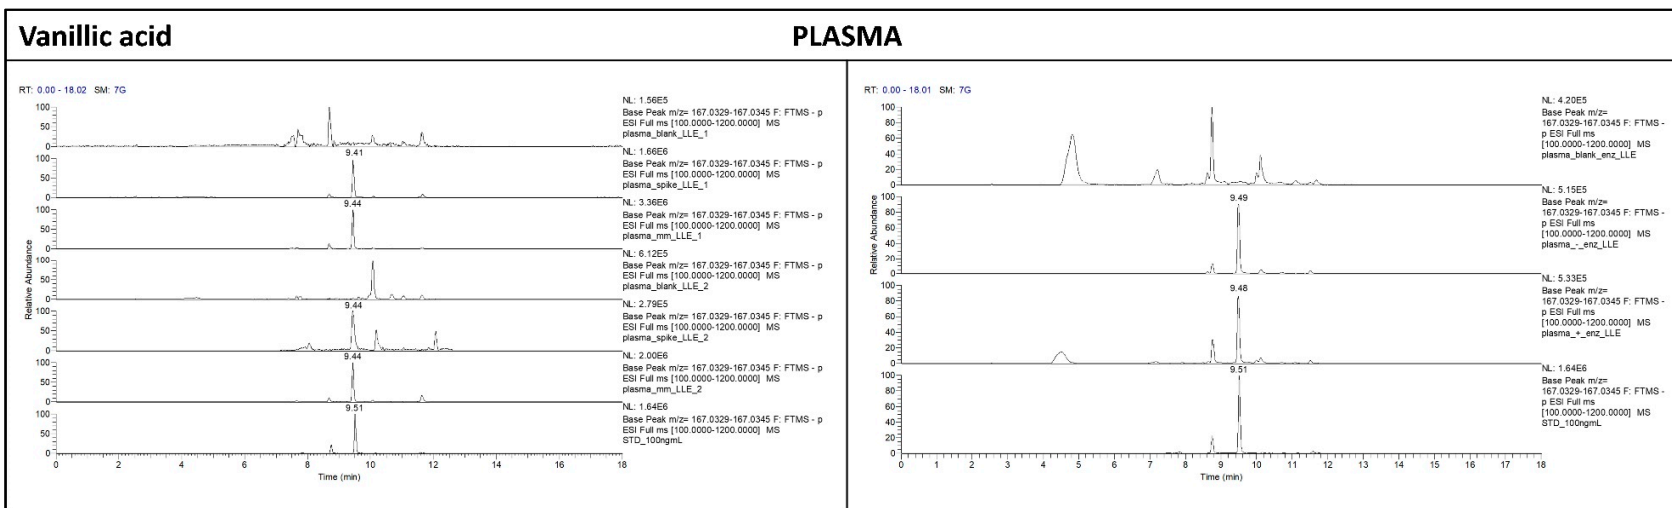

Figure S9a. (continued)

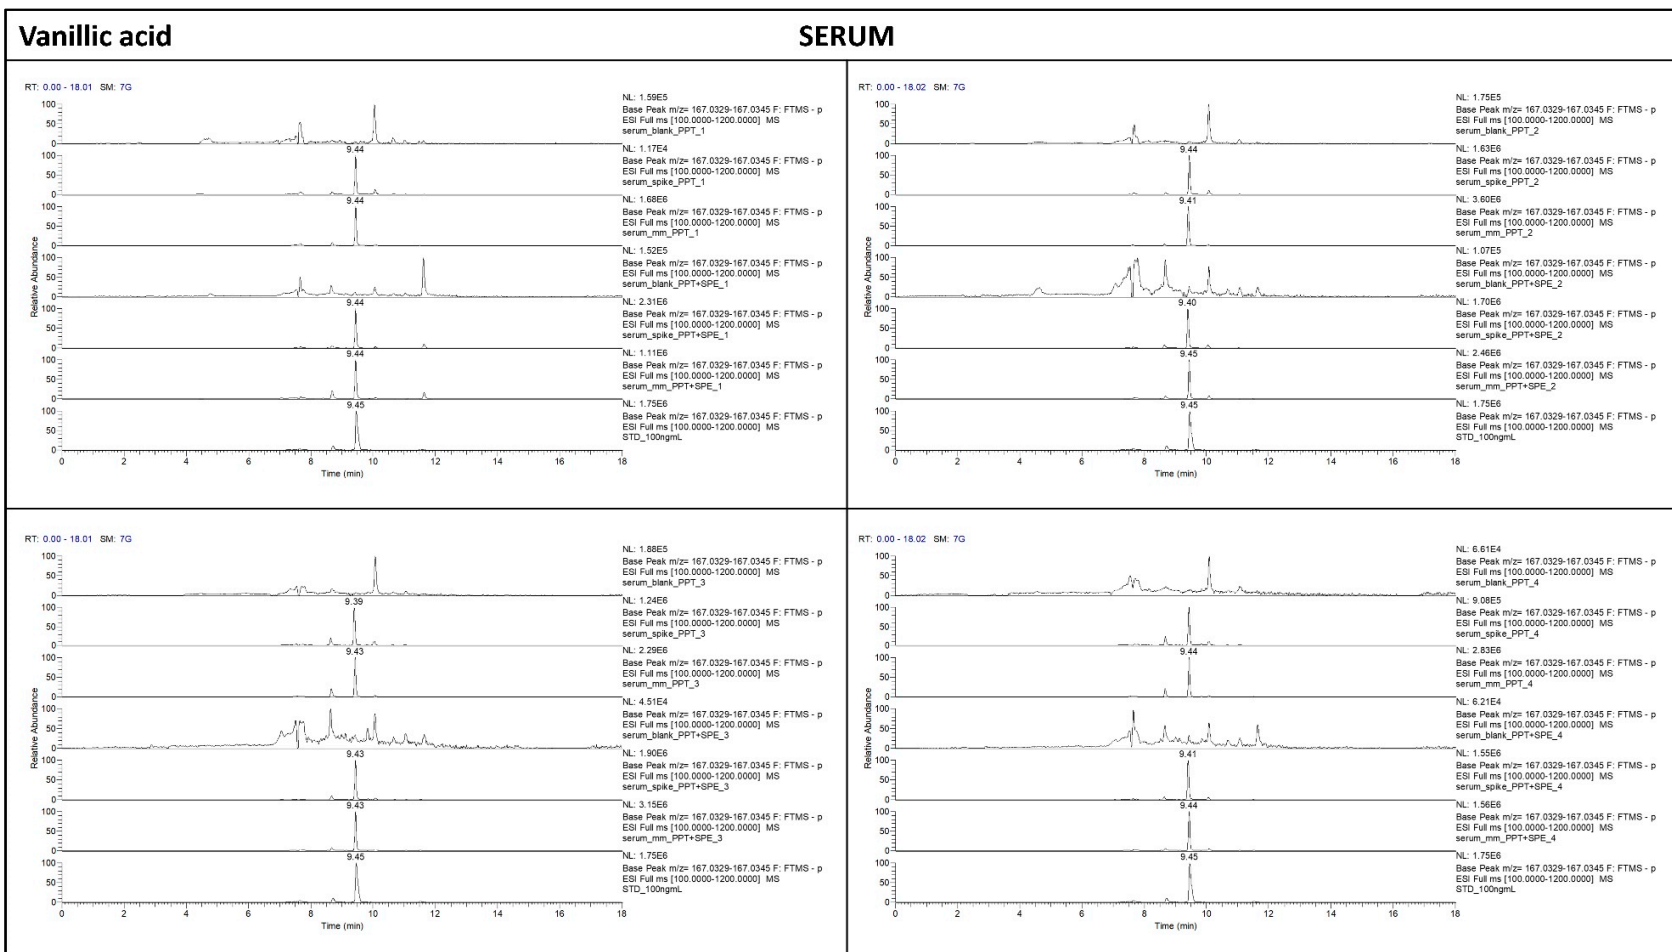

**Figure S9b.** Extracted ion chromatograms (XICs) of vanillic acid (9.50 min) for each pre-treatment method tested for serum samples.

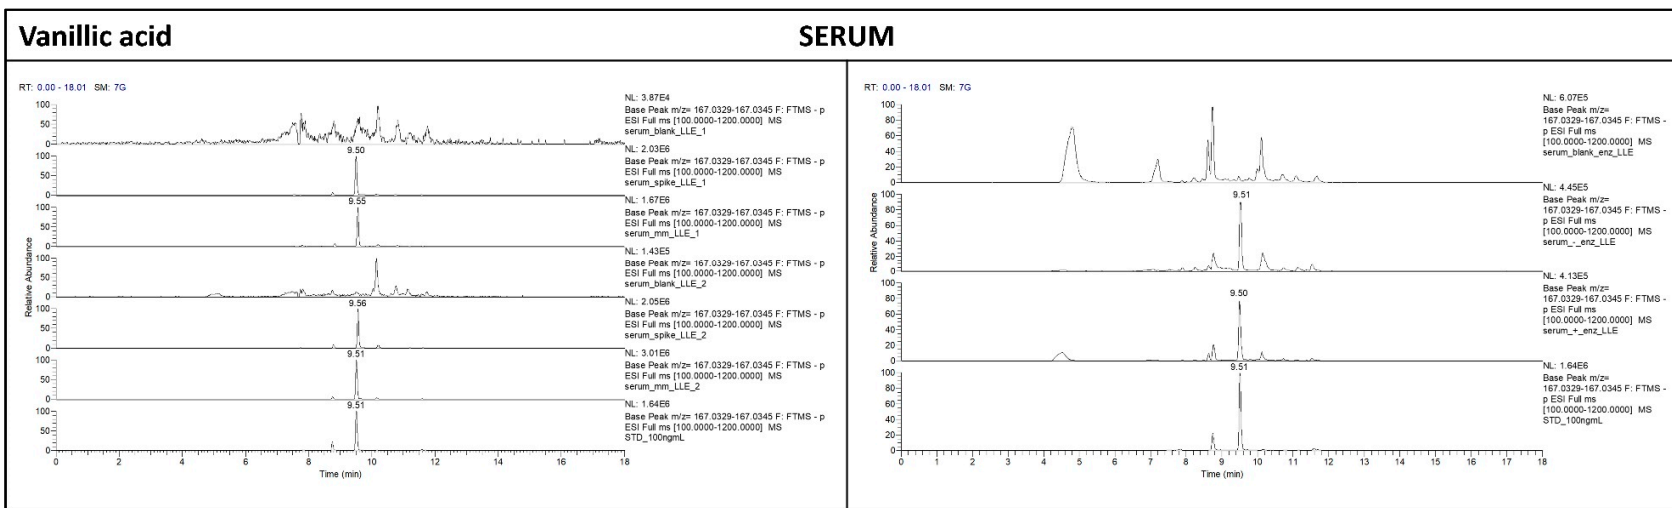

Figure S9b. (continued)

**Table S2.** Calibration curves obtained in serum matrix, linear ranges, limits of detection (LOD), limits of quantitation (LOQ) and matrix effects (%ME) of each analyte.

| Analyte                              | Matrix-matched Calibration Curve<br>(serum) | R <sup>2</sup> | Range<br>(ng/mL) | Matrix Effect<br>(%ME) | LOD/LOQ<br>(ng/mL, serum) |
|--------------------------------------|---------------------------------------------|----------------|------------------|------------------------|---------------------------|
| <b>Isoflavones</b>                   |                                             |                |                  |                        |                           |
| Daidzein                             | $y = 0.2595x + 2.6735$                      | 0.9931         | 0.5-300          | -14                    | 0.2/ 0.7                  |
| Formononetin                         | $y = 0.0982x + 0.4012$                      | 0.9959         | 0.5-300          | -19                    | 0.1/ 0.3                  |
| Genistein                            | $y = 0.1907x + 1.3104$                      | 0.9941         | 0.5-300          | 1                      | 1.1/ 3.2                  |
| <b>Flavanones</b>                    |                                             |                |                  |                        |                           |
| Hesperetin                           | $y = 0.0825x + 0.4625$                      | 0.9952         | 0.5-300          | -18                    | 1.1/ 3.2                  |
| Naringenin                           | $y = 0.1212x + 0.7799$                      | 0.9967         | 0.5-300          | -18                    | 0.9/ 2.7                  |
| <b>Flavones</b>                      |                                             |                |                  |                        |                           |
| Apigenin                             | $y = 0.1379x + 1.1436$                      | 0.9932         | 0.5-300          | -32                    | 0.9/ 2.9                  |
| Chrysin                              | $y = 0.1606x + 0.3186$                      | 0.9909         | 0.5-300          | 33                     | 0.6/ 1.9                  |
| Luteolin                             | $y = 0.0937x + 0.4716$                      | 0.9932         | 0.5-300          | -48                    | 0.2/ 0.6                  |
| <b>Flavonols</b>                     |                                             |                |                  |                        |                           |
| Isorhamnetin                         | $y = 0.0216x + 0.0998$                      | 0.9948         | 0.5-300          | -39                    | 0.8/ 2.5                  |
| Kaempferol                           | $y = 0.0926x + 0.3899$                      | 0.9966         | 0.5-300          | -48                    | 0.9/ 2.9                  |
| Quercetin                            | $y = 0.0367x + 0.0093$                      | 0.9990         | 0.5-300          | -37                    | 0.5/ 1.6                  |
| <b>Flavan-3-ols</b>                  |                                             |                |                  |                        |                           |
| Catechin                             | $y = 0.0184x + 0.0651$                      | 0.9964         | 0.5-300          | -35                    | 0.7/ 2.1                  |
| Epicatechin                          | $y = 0.0189x + 0.0597$                      | 0.9986         | 0.5-300          | -32                    | 0.8/ 2.5                  |
| Epicatechin gallate                  | $y = 0.0032x + 0.0044$                      | 0.9981         | 0.5-300          | -30                    | 3.2/ 9.7                  |
| Epigallocatechin                     | $y = 0.0147x - 0.0221$                      | 0.9980         | 0.5-300          | -24                    | 0.7/ 2.2                  |
| Epigallocatechin gallate             | $y = 0.0014x - 0.0084$                      | 0.9977         | 0.5-300          | -90                    | 0.4/ 1.3                  |
| <b>Flavonol glycosides</b>           |                                             |                |                  |                        |                           |
| Isoquercetin                         | $y = 0.0028x + 0.0086$                      | 0.9979         | 0.5-300          | -40                    | 0.2/ 0.6                  |
| Rutin                                | $y = 0.0007x + 0.0038$                      | 0.9981         | 5-300            | -36                    | 0.9/ 2.7                  |
| <b>Stilbenes</b>                     |                                             |                |                  |                        |                           |
| <i>trans</i> -Resveratrol            | $y = 0.0226x + 0.1796$                      | 0.9907         | 0.5-300          | 9                      | 0.5/ 1.6                  |
| E-Viniferin                          | $y = 0.0018x + 0.0045$                      | 0.9979         | 0.5-300          | -18                    | 0.8/ 2.4                  |
| Piceid                               | $y = 0.0033x + 0.0150$                      | 0.9968         | 0.5-300          | -20                    | 1.1/ 3.2                  |
| <b>Phenylethanoids</b>               |                                             |                |                  |                        |                           |
| 3-Hydroxytyrosol                     | $y = 0.0494x + 0.3187$                      | 0.9900         | 0.5-300          | -6                     | 0.8/ 2.4                  |
| Oleuropein                           | $y = 0.0018x + 0.0103$                      | 0.9967         | 1-300            | -53                    | 1.1/ 3.3                  |
| <b>Cinnamic acid and derivatives</b> |                                             |                |                  |                        |                           |
| <i>trans</i> -Cinnamic acid          | $y = 0.0008x + 0.0019$                      | 0.9953         | 5-300            | -47                    | 0.8/ 2.3                  |
| Caffeic acid                         | $y = 0.0919x - 0.0970$                      | 0.9975         | 0.5-300          | -57                    | 1.6/ 4.9                  |

|                                 |                        |        |         |     |          |
|---------------------------------|------------------------|--------|---------|-----|----------|
| Chlorogenic acid                | $y = 0.0070x + 0.0392$ | 0.9943 | 0.5-300 | -29 | 0.7/ 2   |
| <i>o</i> -Coumaric acid         | $y = 0.0442x - 0.0671$ | 0.9982 | 0.5-300 | 26  | 0.9/ 2.9 |
| <i>p</i> -Coumaric acid         | $y = 0.1147x - 0.1141$ | 0.9980 | 0.5-300 | 6   | 1.1/ 3.2 |
| Ferulic acid                    | $y = 0.0279x - 0.0277$ | 0.9979 | 0.5-300 | -9  | 0.9/ 2.6 |
| Neochlorogenic acid             | $y = 0.0035x + 0.0036$ | 0.9979 | 0.5-300 | -10 | 0.8/ 2.4 |
| Sinapic acid                    | $y = 0.0258x + 0.0095$ | 0.9960 | 0.5-300 | 7   | 0.9/ 2.8 |
| <b>Benzoic acid derivatives</b> |                        |        |         |     |          |
| Gallic acid                     | $y = 0.0357x - 0.1406$ | 0.9979 | 0.5-300 | -67 | 0.5/ 1.6 |
| Syringic acid                   | $y = 0.0050x - 0.0115$ | 0.9975 | 5-300   | -43 | 1.1/ 3.2 |
| Vanillic acid                   | $y = 0.0028x + 0.0003$ | 0.9980 | 1-300   | -28 | 3.1/ 9.3 |

**Table S3.** Accuracy (error, RE%) and precision data (RSD%) of the analytes in spiked serum matrix (n = 6).

| Analytes           | Concentration<br>(ng/mL) | Accuracy<br>RE (%) | Intra-day<br>RSD (%) | Inter-day<br>RSD (%) | Recovery<br>(% mean $\pm$ SD) |
|--------------------|--------------------------|--------------------|----------------------|----------------------|-------------------------------|
| <b>Isoflavones</b> |                          |                    |                      |                      |                               |
| Daidzein           | 1                        | 4.2                | 7.0                  | 10.7                 | 75 $\pm$ 6                    |
|                    | 20                       | 1.3                | 5.8                  | 3.7                  | 71 $\pm$ 1                    |
|                    | 60                       | 8.8                | 6.3                  | 7.2                  | 78 $\pm$ 8                    |
|                    | 160                      | 1.3                | 6.2                  | 4.4                  | 85 $\pm$ 11                   |
| Formononetin       | 1                        | 1.8                | 0.3                  | 1.3                  | 81 $\pm$ 9                    |
|                    | 20                       | 4.4                | 6.0                  | 4.0                  | 81 $\pm$ 4                    |
|                    | 60                       | 2.0                | 3.8                  | 6.3                  | 93 $\pm$ 8                    |
|                    | 160                      | -8.4               | 4.7                  | 7.2                  | 79 $\pm$ 11                   |
| Genistein          | 1                        | -10.8              | 7.5                  | 6.4                  | 81 $\pm$ 7                    |
|                    | 20                       | -7.5               | 8.0                  | 6.8                  | 72 $\pm$ 3                    |
|                    | 60                       | -0.2               | 4.3                  | 4.4                  | 78 $\pm$ 6                    |
|                    | 160                      | 0.1                | 6.6                  | 4.3                  | 89 $\pm$ 6                    |
| <b>Flavanones</b>  |                          |                    |                      |                      |                               |
| Hesperetin         | 10                       | -0.7               | 3.3                  | 3.2                  | 74 $\pm$ 4                    |
|                    | 40                       | 2.0                | 5.1                  | 4.7                  | 70 $\pm$ 6                    |
|                    | 80                       | 5.7                | 1.6                  | 5.5                  | 64 $\pm$ 5                    |
|                    | 160                      | -3.6               | 3.8                  | 5.6                  | 74 $\pm$ 4                    |
| Naringenin         | 10                       | 8.1                | 1.6                  | 7.2                  | 66 $\pm$ 4                    |
|                    | 40                       | 1.1                | 3.7                  | 4.7                  | 66 $\pm$ 7                    |
|                    | 80                       | 4.9                | 5.1                  | 6.0                  | 70 $\pm$ 7                    |
|                    | 160                      | -7.9               | 3.9                  | 7.7                  | 72 $\pm$ 6                    |
| <b>Flavones</b>    |                          |                    |                      |                      |                               |
| Apigenin           | 10                       | -4.0               | 7.1                  | 4.9                  | 66 $\pm$ 5                    |
|                    | 40                       | -7.4               | 5.4                  | 6.3                  | 74 $\pm$ 6                    |
|                    | 80                       | -8.3               | 6.4                  | 4.5                  | 83 $\pm$ 5                    |

|                            |     |       |      |      |         |
|----------------------------|-----|-------|------|------|---------|
|                            | 160 | -1.3  | 5.5  | 4.0  | 74 ± 3  |
| Chrysin                    | 10  | 6.2   | 3.4  | 3.9  | 81 ± 7  |
|                            | 40  | -7.5  | 7.1  | 13.5 | 77 ± 13 |
|                            | 80  | -9.3  | 5.2  | 7.2  | 78 ± 8  |
|                            | 160 | -7.5  | 3.0  | 8.2  | 75 ± 13 |
| Luteolin                   | 1   | -5.7  | 12.8 | 10.0 | 66 ± 8  |
|                            | 40  | -0.2  | 1.6  | 2.2  | 72 ± 5  |
|                            | 80  | 5.7   | 4.7  | 9.9  | 61 ± 4  |
|                            | 160 | -3.8  | 3.7  | 6.0  | 71 ± 2  |
| <b>Flavonols</b>           |     |       |      |      |         |
| Isorhamnetin               | 10  | 1.4   | 10.9 | 7.4  | 64 ± 4  |
|                            | 40  | 5.2   | 7.3  | 6.6  | 69 ± 5  |
|                            | 80  | 0.3   | 5.7  | 6.6  | 70 ± 3  |
|                            | 160 | -3.7  | 3.2  | 4.0  | 73 ± 5  |
| Kaempferol                 | 10  | 5.5   | 2.6  | 5.4  | 61 ± 9  |
|                            | 40  | -1.3  | 3.0  | 4.3  | 67 ± 2  |
|                            | 80  | -2.3  | 4.4  | 4.9  | 61 ± 6  |
|                            | 160 | -5.6  | 4.5  | 5.1  | 75 ± 7  |
| Quercetin                  | 10  | 5.1   | 6.1  | 8.2  | 69 ± 6  |
|                            | 40  | -2.1  | 7.0  | 5.2  | 72 ± 6  |
|                            | 80  | 0.3   | 1.8  | 5.2  | 68 ± 5  |
|                            | 160 | -0.9  | 4.4  | 3.4  | 70 ± 9  |
| <b>Flavan-3-ols</b>        |     |       |      |      |         |
| Epicatechin                | 10  | 5.2   | 5.4  | 3.7  | 69 ± 4  |
|                            | 40  | 2.4   | 14.3 | 12.1 | 73 ± 9  |
|                            | 80  | -0.8  | 5.0  | 6.6  | 64 ± 4  |
|                            | 100 | -7.9  | 4.7  | 7.2  | 72 ± 6  |
| Epigallocatechin           | 10  | -11.2 | 1.5  | 4.0  | 53 ± 3  |
|                            | 40  | 1.6   | 5.1  | 4.7  | 82 ± 6  |
|                            | 80  | -1.0  | 2.0  | 4.9  | 78 ± 4  |
|                            | 160 | 4.0   | 5.3  | 4.2  | 83 ± 20 |
| Epigallocatechin gallate   | 10  | 1.3   | 8.0  | 9.0  | 76 ± 6  |
|                            | 40  | -7.7  | 0.7  | 4.1  | 75 ± 5  |
|                            | 80  | 0.7   | 7.8  | 7.2  | 92 ± 6  |
|                            | 160 | -7.3  | 0.5  | 7.5  | 90 ± 5  |
| Catechin                   | 10  | -1.2  | 8.4  | 5.7  | 71 ± 2  |
|                            | 40  | 3.0   | 1.7  | 10.0 | 77 ± 11 |
|                            | 80  | 9.3   | 5.4  | 9.5  | 64 ± 9  |
|                            | 160 | -3.7  | 6.5  | 7.9  | 78 ± 9  |
| Epicatechin gallate        | 10  | 3.2   | 2.4  | 4.6  | 83 ± 1  |
|                            | 40  | -11.0 | 11.9 | 8.0  | 88 ± 10 |
|                            | 80  | -0.9  | 5.8  | 7.5  | 76 ± 5  |
|                            | 160 | -10.9 | 5.8  | 6.9  | 92 ± 11 |
| <b>Flavonol glycosides</b> |     |       |      |      |         |
| Isoquercetin               | 1   | -3.5  | 7.5  | 6.0  | 53 ± 2  |

|                                      |     |      |     |      |         |
|--------------------------------------|-----|------|-----|------|---------|
|                                      | 20  | 0.2  | 3.4 | 3.4  | 60 ± 4  |
|                                      | 60  | -2.2 | 4.9 | 4.8  | 71 ± 7  |
|                                      | 160 | 2.3  | 2.6 | 2.8  | 80 ± 6  |
| Rutin                                | 10  | 3.8  | 3.1 | 4.9  | 56 ± 6  |
|                                      | 40  | -0.3 | 3.0 | 5.1  | 86 ± 10 |
|                                      | 80  | -0.8 | 1.1 | 6.3  | 72 ± 9  |
|                                      | 160 | -1.4 | 3.3 | 3.3  | 85 ± 8  |
| <b>Stilbenes</b>                     |     |      |     |      |         |
| <i>trans</i> -Resveratrol            | 10  | 4.0  | 4.6 | 9.4  | 59 ± 6  |
|                                      | 40  | 2.0  | 9.6 | 9.7  | 56 ± 6  |
|                                      | 80  | 1.2  | 0.9 | 7.0  | 56 ± 5  |
|                                      | 160 | -0.3 | 0.4 | 1.7  | 48 ± 6  |
| E-Viniferin                          | 10  | -1.2 | 1.5 | 3.6  | 73 ± 3  |
|                                      | 40  | 1.4  | 3.0 | 6.5  | 70 ± 6  |
|                                      | 80  | -1.4 | 5.3 | 4.1  | 81 ± 4  |
|                                      | 160 | -0.6 | 1.9 | 3.4  | 82 ± 7  |
| Piceid                               | 10  | 0.0  | 8.5 | 6.0  | 62 ± 6  |
|                                      | 40  | 7.2  | 2.1 | 5.7  | 83 ± 13 |
|                                      | 80  | -1.0 | 4.3 | 4.4  | 73 ± 5  |
|                                      | 160 | 0.3  | 5.0 | 3.7  | 73 ± 22 |
| <b>Phenylethanoids</b>               |     |      |     |      |         |
| 3-Hydroxytyrosol                     | 10  | 4.4  | 8.3 | 11.2 | 68 ± 9  |
|                                      | 40  | 6.6  | 3.0 | 6.8  | 77 ± 7  |
|                                      | 80  | -3.8 | 4.1 | 6.4  | 68 ± 7  |
|                                      | 160 | 1.8  | 1.2 | 5.0  | 70 ± 7  |
| Oleuropein                           | 10  | 2.9  | 6.8 | 5.8  | 84 ± 4  |
|                                      | 40  | -0.3 | 8.3 | 5.9  | 81 ± 2  |
|                                      | 80  | 0.6  | 2.0 | 2.3  | 79 ± 6  |
|                                      | 160 | 1.1  | 1.1 | 2.3  | 81 ± 8  |
| <b>Cinnamic acid and derivatives</b> |     |      |     |      |         |
| Caffeic acid                         | 10  | 3.6  | 1.8 | 10.2 | 86 ± 8  |
|                                      | 40  | -7.7 | 8.5 | 8.4  | 80 ± 10 |
|                                      | 80  | -2.7 | 6.1 | 7.5  | 67 ± 5  |
|                                      | 160 | -1.4 | 4.8 | 3.4  | 81 ± 5  |
| <i>trans</i> -Cinnamic acid          | 10  | 3.4  | 5.6 | 6.5  | 42 ± 5  |
|                                      | 40  | 2.0  | 1.6 | 7.2  | 40 ± 5  |
|                                      | 80  | 2.3  | 1.5 | 4.0  | 38 ± 4  |
|                                      | 160 | -0.6 | 2.8 | 1.9  | 46 ± 12 |
| Chlorogenic acid                     | 10  | -3.0 | 4.5 | 7.4  | 55 ± 6  |
|                                      | 40  | -0.8 | 1.5 | 3.8  | 50 ± 5  |
|                                      | 80  | -0.6 | 1.6 | 4.4  | 65 ± 9  |
|                                      | 160 | 0.2  | 2.6 | 2.1  | 56 ± 4  |
| <i>o</i> -Coumaric acid              | 10  | -1.6 | 3.9 | 4.8  | 87 ± 8  |
|                                      | 40  | -3.8 | 6.0 | 6.7  | 82 ± 1  |
|                                      | 80  | -1.7 | 3.4 | 6.0  | 76 ± 9  |

|                                 |     |      |     |      |         |
|---------------------------------|-----|------|-----|------|---------|
|                                 | 160 | -3.4 | 7.8 | 6.3  | 77 ± 7  |
| <i>p</i> -Coumaric acid         | 10  | 5.2  | 5.1 | 8.5  | 72 ± 11 |
|                                 | 40  | -4.4 | 5.5 | 6.9  | 83 ± 7  |
|                                 | 80  | -7.3 | 3.5 | 6.0  | 81 ± 6  |
|                                 | 160 | -1.4 | 8.5 | 5.7  | 87 ± 10 |
| Ferulic acid                    | 10  | 14.9 | 0.8 | 10.6 | 73 ± 12 |
|                                 | 40  | -0.1 | 8.8 | 7.4  | 67 ± 9  |
|                                 | 80  | -2.0 | 6.0 | 7.0  | 71 ± 9  |
|                                 | 160 | -7.0 | 3.3 | 7.4  | 84 ± 14 |
| Neochlorogenic acid             | 10  | 3.7  | 0.6 | 4.6  | 28 ± 2  |
|                                 | 40  | -4.1 | 8.4 | 6.9  | 45 ± 5  |
|                                 | 80  | -8.0 | 4.9 | 5.8  | 29 ± 7  |
|                                 | 160 | 1.6  | 2.6 | 1.9  | 41 ± 8  |
| Sinapic acid                    | 10  | 4.9  | 4.2 | 5.6  | 78 ± 6  |
|                                 | 40  | -2.3 | 7.4 | 9.1  | 83 ± 5  |
|                                 | 80  | 0.2  | 1.0 | 1.6  | 71 ± 7  |
|                                 | 160 | -1.2 | 2.3 | 3.2  | 78 ± 8  |
| <b>Benzoic acid derivatives</b> |     |      |     |      |         |
| Gallic acid                     | 1   | 3.0  | 4.2 | 5.3  | 36 ± 6  |
|                                 | 40  | -7.1 | 7.7 | 5.4  | 32 ± 3  |
|                                 | 80  | -6.7 | 2.1 | 2.1  | 33 ± 1  |
|                                 | 160 | 5.3  | 1.4 | 2.1  | 42 ± 9  |
| Syringic acid                   | 10  | 3.0  | 3.4 | 6.3  | 46 ± 49 |
|                                 | 40  | -0.1 | 4.6 | 4.1  | 12 ± 3  |
|                                 | 80  | 0.9  | 0.2 | 1.3  | 27 ± 4  |
|                                 | 160 | 0.5  | 1.4 | 1.9  | 27 ± 3  |
| Vanillic acid                   | 10  | 4.4  | 3.4 | 6.8  | 66 ± 9  |
|                                 | 40  | -3.8 | 6.9 | 5.6  | 59 ± 5  |
|                                 | 80  | -1.1 | 3.2 | 5.3  | 84 ± 8  |
|                                 | 160 | -0.2 | 3.1 | 3.3  | 80 ± 8  |

**Table S4.** Stability of analytes in serum samples under various storage conditions (n = 3).



| Analyte                    | Concentration<br>(ng/mL) | Auto sampler<br>temperature (4°C)<br>after 24 h | After one freeze-<br>thaw cycle | Long-term<br>stability (2<br>months, stored at<br>-40°C) |
|----------------------------|--------------------------|-------------------------------------------------|---------------------------------|----------------------------------------------------------|
| <b>Isoflavones</b>         |                          |                                                 |                                 |                                                          |
| Daidzein                   | 10                       | 9.6 ± 0.3 (3.6)                                 | 10.3 ± 1 (9.4)                  | 10.1 ± 1 (10)                                            |
|                            | 80                       | 88.1 ± 6.6 (7.4)                                | 82.7 ± 4.3 (5.1)                | 84.1 ± 4.7 (5.6)                                         |
| Formononetin               | 10                       | 10 ± 0.4 (4.1)                                  | 10.1 ± 0.2 (2.1)                | 10.2 ± 0.1 (1.4)                                         |
|                            | 80                       | 82.3 ± 10.7 (13)                                | 83.3 ± 5.6 (6.7)                | 79.2 ± 5.4 (6.8)                                         |
| Genistein                  | 10                       | 10.4 ± 0.8 (7.6)                                | 10 ± 1 (9.5)                    | 10.1 ± 1.1 (11.1)                                        |
|                            | 80                       | 81.7 ± 2.3 (2.8)                                | 78.5 ± 3 (3.9)                  | 78.1 ± 4.1 (5.2)                                         |
| <b>Flavanones</b>          |                          |                                                 |                                 |                                                          |
| Hesperetin                 | 10                       | 10.2 ± 0.5 (4.5)                                | 10.2 ± 0.3 (3.2)                | 10.3 ± 0.1 (0.7)                                         |
|                            | 80                       | 86.8 ± 5.7 (6.6)                                | 83.1 ± 1.4 (1.7)                | 85.2 ± 7 (8.2)                                           |
| Naringenin                 | 10                       | 10.1 ± 0.8 (7.8)                                | 9.8 ± 0.8 (8.3)                 | 9.9 ± 0.7 (7)                                            |
|                            | 80                       | 81.5 ± 7.3 (9)                                  | 79.3 ± 5.2 (6.5)                | 81.3 ± 2.2 (2.7)                                         |
| <b>Flavones</b>            |                          |                                                 |                                 |                                                          |
| Apigenin                   | 10                       | 9.4 ± 0.1 (0.9)                                 | 9.6 ± 0.7 (6.9)                 | 9.9 ± 0.5 (4.6)                                          |
|                            | 80                       | 73.1 ± 4.3 (5.9)                                | 75.6 ± 1.6 (2.1)                | 74.4 ± 2 (2.7)                                           |
| Chrysin                    | 10                       | 10.3 ± 0.4 (3.4)                                | 10.4 ± 0.6 (5.3)                | 10.3 ± 0.3 (3)                                           |
|                            | 80                       | 79.7 ± 4.1 (5.1)                                | 74.3 ± 3.5 (4.7)                | 75.2 ± 8 (10.7)                                          |
| Luteolin                   | 10                       | 10.4 ± 0.5 (4.5)                                | 10.4 ± 0.1 (0.7)                | 10.6 ± 0.3 (2.7)                                         |
|                            | 80                       | 82.2 ± 3.6 (4.4)                                | 80.4 ± 6.7 (8.4)                | 73.5 ± 6.8 (9.3)                                         |
| <b>Flavonols</b>           |                          |                                                 |                                 |                                                          |
| Isorhamnetin               | 10                       | 10.4 ± 0.5 (4.3)                                | 9.9 ± 0.8 (8.1)                 | 10.4 ± 1.2 (11.1)                                        |
|                            | 80                       | 81.6 ± 7 (8.6)                                  | 80.7 ± 5.2 (6.4)                | 75.2 ± 1.4 (1.9)                                         |
| Kaempferol                 | 10                       | 10.2 ± 0.2 (2.4)                                | 10 ± 0.8 (8)                    | 10 ± 0.7 (6.7)                                           |
|                            | 80                       | 79.6 ± 4.9 (6.2)                                | 80.9 ± 2.7 (3.3)                | 76.9 ± 4.2 (5.5)                                         |
| Quercetin                  | 10                       | 9.7 ± 1 (10.7)                                  | 9.5 ± 0.8 (7.9)                 | 10.3 ± 0.7 (6.4)                                         |
|                            | 80                       | 80.1 ± 2.6 (3.2)                                | 76.4 ± 5.1 (6.7)                | 77.2 ± 5.7 (7.3)                                         |
| <b>Flavan-3-ols</b>        |                          |                                                 |                                 |                                                          |
| Catechin                   | 10                       | 10.1 ± 0.6 (6.1)                                | 9.4 ± 0.2 (2.4)                 | 9.9 ± 0.7 (7.3)                                          |
|                            | 80                       | 81.5 ± 10.3 (12.6)                              | 77.2 ± 7.3 (9.4)                | 80.9 ± 6.6 (8.2)                                         |
| Epicatechin                | 10                       | 10.5 ± 0.2 (2.2)                                | 10.6 ± 0.5 (4.9)                | 10.8 ± 0.6 (5.1)                                         |
|                            | 80                       | 79.1 ± 7.7 (9.8)                                | 74.8 ± 4 (5.3)                  | 78.8 ± 4.5 (5.8)                                         |
| Epicatechin gallate        | 10                       | 10.5 ± 0.6 (5.3)                                | 10.9 ± 0.4 (3.5)                | 10.4 ± 0.6 (6)                                           |
|                            | 80                       | 75.1 ± 7.5 (10)                                 | 77.4 ± 4.1 (5.3)                | 74.3 ± 7.5 (10.1)                                        |
| Epigallocatechin           | 10                       | 8.8 ± 0.5 (5.5)                                 | 8.8 ± 0.5 (5.4)                 | 9.2 ± 0.1 (1.5)                                          |
|                            | 80                       | 80.2 ± 3.4 (4.3)                                | 79.3 ± 1.5 (1.9)                | 78.4 ± 5.8 (7.4)                                         |
| Epigallocatechin gallate   | 10                       | 11 ± 0.9 (8.6)                                  | 10.8 ± 1.2 (11.1)               | 10.6 ± 1 (9.3)                                           |
|                            | 80                       | 78.2 ± 2.1 (2.7)                                | 81.8 ± 5.5 (6.7)                | 74.8 ± 3.6 (4.8)                                         |
| <b>Flavonol glycosides</b> |                          |                                                 |                                 |                                                          |
| Isoquercetin               | 10                       | 10.9 ± 0.1 (1.2)                                | 10.5 ± 0.4 (3.4)                | 10.8 ± 0.6 (5.2)                                         |
|                            | 80                       | 82.3 ± 7.5 (9.1)                                | 81.3 ± 6 (7.4)                  | 76.5 ± 2.7 (3.6)                                         |

|                                      |    |                   |                   |                   |
|--------------------------------------|----|-------------------|-------------------|-------------------|
| <b>Rutin</b>                         | 10 | 10.1 ± 0.1 (1.4)  | 9.8 ± 0.5 (5.6)   | 10.1 ± 0.8 (7.5)  |
|                                      | 80 | 84.6 ± 6.9 (8.1)  | 85.1 ± 6.8 (7.9)  | 81 ± 2.5 (3.1)    |
| <b>Stilbenes</b>                     |    |                   |                   |                   |
| <i>trans</i> -Resveratrol            | 10 | 9.2 ± 0.6 (7.1)   | 9.4 ± 1.2 (12.8)  | 9.5 ± 0.9 (9)     |
|                                      | 80 | 80.5 ± 4 (5)      | 80.1 ± 3.9 (4.9)  | 72.8 ± 7.1 (9.8)  |
| E-Viniferin                          | 10 | 10.3 ± 0.5 (4.5)  | 10.3 ± 0.5 (4.8)  | 10.2 ± 0.1 (1.3)  |
|                                      | 80 | 82.7 ± 1.8 (2.2)  | 78.5 ± 2.2 (2.8)  | 79.7 ± 3.5 (4.4)  |
| Piceid                               | 10 | 9.8 ± 0.7 (7.2)   | 10.3 ± 0.3 (2.5)  | 10.3 ± 0.5 (5.2)  |
|                                      | 80 | 82.2 ± 3.7 (4.5)  | 81.5 ± 5.5 (6.7)  | 81.9 ± 1.2 (1.4)  |
| <b>Phenylethanoids</b>               |    |                   |                   |                   |
| 3-Hydroxytyrosol                     | 10 | 10.1 ± 1.4 (13.4) | 9 ± 0.6 (6.7)     | 9.7 ± 1.5 (15.6)  |
|                                      | 80 | 83.3 ± 5.1 (6.2)  | 80.2 ± 2.6 (3.2)  | 79.9 ± 5.7 (7.1)  |
| Oleuropein                           | 10 | 10.6 ± 0.8 (7.3)  | 10.5 ± 0.4 (3.8)  | 10.9 ± 0.5 (4.3)  |
|                                      | 80 | 81 ± 2.3 (2.9)    | 81.7 ± 2.2 (2.7)  | 80.4 ± 1.6 (2)    |
| <b>Cinnamic acid and derivatives</b> |    |                   |                   |                   |
| <i>trans</i> -Cinnamic acid          | 10 | 9.6 ± 0.4 (4.4)   | 9.5 ± 0.4 (3.8)   | 10 ± 0.9 (9)      |
|                                      | 80 | 83.3 ± 0 (0)      | 80.7 ± 0.3 (0.4)  | 79.7 ± 4.5 (5.7)  |
| Caffeic acid                         | 10 | 9.1 ± 1.2 (12.9)  | 9.7 ± 1 (10.7)    | 9.9 ± 0.7 (7.1)   |
|                                      | 80 | 75 ± 8.9 (11.9)   | 74.8 ± 0.6 (0.8)  | 72.1 ± 5.6 (7.8)  |
| Chlorogenic acid                     | 10 | 10.2 ± 0.8 (7.5)  | 10.6 ± 0.6 (6.1)  | 10.6 ± 0.9 (8.9)  |
|                                      | 80 | 77.4 ± 3.6 (4.7)  | 75.7 ± 4 (5.3)    | 78.1 ± 4.1 (5.2)  |
| <i>o</i> -Coumaric acid              | 10 | 9.5 ± 0.5 (4.9)   | 10 ± 0.2 (2.5)    | 9.8 ± 0.7 (7.2)   |
|                                      | 80 | 78.7 ± 5.4 (6.9)  | 76.8 ± 5.5 (7.2)  | 73.3 ± 3 (4.1)    |
| <i>p</i> -Coumaric acid              | 10 | 9.6 ± 0.6 (6.5)   | 9.5 ± 0.6 (6.2)   | 9.7 ± 1.2 (12.6)  |
|                                      | 80 | 76.3 ± 5.5 (7.2)  | 75 ± 5.9 (7.9)    | 70.6 ± 1 (1.4)    |
| Ferulic acid                         | 10 | 10.1 ± 1.1 (10.8) | 10.1 ± 1.2 (12.2) | 10.2 ± 1.2 (11.8) |
|                                      | 80 | 77.8 ± 7.6 (9.8)  | 77.7 ± 4 (5.2)    | 72 ± 2.6 (3.6)    |
| Neochlorogenic acid                  | 10 | 10.4 ± 0.1 (1.4)  | 10.7 ± 0.4 (3.7)  | 10.8 ± 0.7 (6.1)  |
|                                      | 80 | 78 ± 2.2 (2.8)    | 73.1 ± 3.4 (4.7)  | 73.3 ± 6.2 (8.5)  |
| Sinapic acid                         | 10 | 9.8 ± 0.3 (3.1)   | 9.9 ± 0.7 (7.4)   | 10.3 ± 0.7 (6.7)  |
|                                      | 80 | 79.4 ± 1 (1.3)    | 79.2 ± 1.6 (2.1)  | 78.4 ± 0.9 (1.1)  |
| <b>Benzoic acid derivatives</b>      |    |                   |                   |                   |
| Gallic acid                          | 10 | 9.3 ± 1.1 (11.6)  | 9.6 ± 1.1 (11)    | 10.4 ± 0.4 (4.2)  |
|                                      | 80 | 74.6 ± 1.9 (2.6)  | 74.6 ± 1.7 (2.3)  | 74.9 ± 1.7 (2.3)  |
| Syringic acid                        | 10 | 9.4 ± 0.5 (4.8)   | 9.8 ± 0.7 (6.9)   | 10.2 ± 0.5 (4.8)  |
|                                      | 80 | 79.9 ± 0.8 (1)    | 79.4 ± 1.3 (1.7)  | 79.8 ± 1.3 (1.6)  |
| Vanillic acid                        | 10 | 10 ± 0.7 (7)      | 9.5 ± 0.5 (5.8)   | 10.1 ± 0.8 (8.3)  |
|                                      | 80 | 76.3 ± 4.8 (6.3)  | 78.6 ± 4.2 (5.3)  | 75.2 ± 4.5 (5.9)  |

**Table S5**

Polar phenol content of Corinthian currant and rat food (mg/100g).

| Polar Phenol                     | Corinthian Currant | Rat Food     |
|----------------------------------|--------------------|--------------|
| <b>Isoflavones</b>               |                    |              |
| Daidzein                         | n.d.               | 111.6 ± 21.6 |
| Formononetin                     | n.d.               | 6.1 ± 1.4    |
| Genistein                        | 0.2 ± 0.1          | 286.3 ± 46.7 |
| <b>Flavanones</b>                |                    |              |
| Hesperetin                       | 0.6 ± 0            | 1.2 ± 0.3    |
| Naringenin                       | 2.2 ± 0.3          | 2.4 ± 0.8    |
| <b>Flavones</b>                  |                    |              |
| Apigenin                         | n.d.               | 30.9 ± 3.3   |
| Luteolin                         | 1.14 ± 0.16        | 27.4 ± 8     |
| Chrysin                          | 0.15 ± 0.04        | n.d.         |
| <b>Flavonols</b>                 |                    |              |
| Isorhamnetin                     | 27.3 ± 0.8         | 0.9 ± 0.2    |
| Kaempferol                       | 35 ± 4.8           | 12.1 ± 2     |
| Quercetin                        | 172.79 ± 19.38     | 4.1 ± 1.2    |
| <b>Flavonol glycosides</b>       |                    |              |
| Isoquercetin                     | 479.61 ± 70.81     | 3.1 ± 1.3    |
| Rutin                            | 118.83 ± 13.91     | 11 ± 2.7     |
| <b>Stilbenes</b>                 |                    |              |
| trans-Resveratrol                | 3.3 ± 0.4          | n.d.         |
| E-Viniferin                      | 3.5 ± 0.2          | n.d.         |
| Piceid                           | 27.9 ± 3.8         | 8.9 ± 1.3    |
| <b>Cinnamic acid derivatives</b> |                    |              |
| Caffeic acid                     | 52.1 ± 1.5         | 19.6 ± 2.4   |
| Ferulic acid                     | 9.9 ± 1.3          | 58.6 ± 14.8  |
| p-Coumaric acid                  | 10.9 ± 1.1         | 76.4 ± 12.5  |
| <b>Benzoic acid derivatives</b>  |                    |              |
| Gallic acid                      | 193.1 ± 22.1       | 4.4 ± 1.5    |
| Syringic acid                    | 122.2 ± 18.7       | 33.4 ± 5     |
| Vanillic acid                    | 286.2 ± 45.1       | 39.5 ± 6.4   |
